## 1 An Atlas of Human and Murine Genetic Influences on Osteoporosis

2  
3 John A. Morris<sup>1,2§</sup>, John P. Kemp<sup>3,4§</sup>, Scott E. Youtten<sup>5</sup>, Laetitia Laurent<sup>2</sup>, John G. Logan<sup>6</sup>, Ryan  
4 Chai<sup>5</sup>, Nicholas A. Vulpescu<sup>7</sup>, Vincenzo Forgetta<sup>2</sup>, Aaron Kleinman<sup>8</sup>, Sindhu Mohanty<sup>5</sup>, C.  
5 Marcelo Sergio<sup>5</sup>, Julian Quinn<sup>5</sup>, Loan Nguyen-Yamamoto<sup>9</sup>, Aimee Lee Luco<sup>9</sup>, Jinchu Vijay<sup>10</sup>,  
6 Marie-Michelle Simon<sup>10</sup>, Albena Pramatarova<sup>10</sup>, Carolina Medina-Gomez<sup>11</sup>, Katerina  
7 Trajanoska<sup>11</sup>, Elena J. Ghirardello<sup>6</sup>, Natalie C. Butterfield<sup>6</sup>, Katharine F. Curry<sup>6</sup>, Victoria D.  
8 Leitch<sup>6</sup>, Penny C. Sparkes<sup>6</sup>, Anne-Tounsia Adoum<sup>6</sup>, Naila S. Mannan<sup>6</sup>, Davide Komla-Ebri<sup>6</sup>,  
9 Andrea S. Pollard<sup>6</sup>, Hannah F. Dewhurst<sup>6</sup>, Thomas Hassall<sup>3</sup>, Michael-John G Beltejar<sup>12</sup>, Douglas  
10 J Adams<sup>13</sup>, Suzanne M. Vaillancourt<sup>14</sup>, Stephen Kaptoge<sup>15</sup>, Paul Baldock<sup>5</sup>, Cyrus Cooper<sup>16,17,18</sup>,  
11 Jonathan Reeve<sup>19</sup>, Evangelia Ntzani<sup>20</sup>, Evangelos Evangelou<sup>20</sup>, Claes Ohlsson<sup>21</sup>, David  
12 Karasik<sup>22</sup>, Fernando Rivadeneira<sup>11</sup>, Douglas P. Kiel<sup>22</sup>, Jonathan H. Tobias<sup>23</sup>, Celia L. Gregson<sup>23</sup>,  
13 Nicholas C. Harvey<sup>16,17</sup>, Elin Grundberg<sup>10,24</sup>, David Goltzman<sup>9</sup>, David J. Adams<sup>25</sup>, Christopher J.  
14 Lelliott<sup>25</sup>, David A. Hinds<sup>8</sup>, Cheryl L. Ackert-Bicknell<sup>26</sup>, Yi-Hsiang Hsu<sup>22</sup>, Matthew T. Maurano<sup>7</sup>,  
15 Peter I. Croucher<sup>5</sup>, Graham R. Williams<sup>6</sup>, J. H. Duncan Bassett<sup>6</sup>, David M. Evans<sup>3,4#\*</sup>, J. Brent  
16 Richards<sup>1,2,14,27#\*</sup>

17  
18 <sup>1</sup> Department of Human Genetics, McGill University, Montréal, Québec, Canada

19 <sup>2</sup> Lady Davis Institute, Jewish General Hospital, McGill University, Montréal, Québec, Canada

20 <sup>3</sup> University of Queensland Diamantina Institute, Translational Research Institute, Brisbane,  
21 Queensland, Australia

22 <sup>4</sup> MRC Integrative Epidemiology Unit, University of Bristol, Bristol, UK

23 <sup>5</sup> Garvan Institute of Medical Research, Sydney, New South Wales, Australia

24 <sup>6</sup> Molecular Endocrinology Laboratory, Department of Medicine, Imperial College London,  
25 London, UK

26 <sup>7</sup> Institute for Systems Genetics, New York University Langone Medical Center, New York, New  
27 York, USA

28 <sup>8</sup> Department of Research, 23andMe, Mountain View, California, USA

29 <sup>9</sup> Research Institute of the McGill University Health Centre, Montréal, Québec, Canada

30 <sup>10</sup> McGill University and Genome Quebec Innovation Centre, Montréal, Québec, Canada

31 <sup>11</sup> Department of Internal Medicine, Erasmus Medical Center, Rotterdam, Netherlands

32 <sup>12</sup> Department of Biomedical Genetics, University of Rochester, Rochester, New York, USA

33 <sup>13</sup> Department of Orthopedics, University of Colorado Anschutz Medical Campus, Aurora,  
34 Colorado, USA

35 <sup>14</sup> Departments of Medicine and Epidemiology, Biostatistics & Occupational Health, McGill  
36 University, Montréal, Québec, Canada

37 <sup>15</sup> Department of Public Health and Primary Care, University of Cambridge, Cambridge, UK

38 <sup>16</sup> MRC Lifecourse Epidemiology Unit, University of Southampton, Southampton, UK

39 <sup>17</sup> NIHR Southampton Biomedical Research Centre, University of Southampton and University  
40 Hospital Southampton NHS Foundation Trust, Tremona Road, Southampton, UK

41 <sup>18</sup> NIHR Oxford Biomedical Research Centre, University of Oxford, Oxford, UK

42 <sup>19</sup> NIHR Musculoskeletal Biomedical Research Unit, Botnar Research Centre, Nuffield  
43 Department of Orthopaedics, Rheumatology and Musculoskeletal Sciences, Oxford, UK

44 <sup>20</sup> Department of Hygiene and Epidemiology, University of Ioannina Medical School, Ioannina,  
45 Greece

46 <sup>21</sup> Department of Internal Medicine and Clinical Nutrition, University of Gothenburg, Gothenburg,  
47 Sweden

48 <sup>22</sup> Institute for Aging Research, Hebrew SeniorLife, Boston, Massachusetts, USA

49 <sup>23</sup> Musculoskeletal Research Unit, Department of Translational Health Sciences, University of  
50 Bristol, Bristol, UK

51 <sup>24</sup> Children's Mercy Hospitals and Clinics, Kansas City, Missouri, USA

52 <sup>25</sup> Wellcome Trust Sanger Institute, Wellcome Genome Campus, Hinxton, Cambridge, UK  
53 <sup>26</sup> Center for Musculoskeletal Research, Department of Orthopaedics, University of Rochester,  
54 Rochester, New York, USA  
55 <sup>27</sup> Department of Twin Research and Genetic Epidemiology, King's College London, London,  
56 UK  
57

58 § These authors contributed equally

59 # These authors contributed equally

60

61 \* Address for correspondence:

62 **J. Brent Richards**

63 H413, Jewish General Hospital,

64 3755 Côte Ste Catherine, Montréal, QC, H3T 1E2

65 CANADA

66 Email: [brent.richards@mcgill.ca](mailto:brent.richards@mcgill.ca)

67

68 **David M. Evans**

69 University of Queensland Diamantina Institute

70 Level 8, 37 Kent St

71 Translational Research Institute

72 Woolloongabba, QLD, 4201

73 AUSTRALIA

74 Email: [d.evans1@uq.edu.au](mailto:d.evans1@uq.edu.au)

75 **Abstract**

76 Osteoporosis is a common debilitating chronic disease diagnosed primarily using bone mineral  
77 density (BMD). We undertook a comprehensive assessment of human genetic determinants of  
78 bone density in 426,824 individuals, identifying a total of 518 genome-wide significant loci, (301  
79 novel), explaining 20% of the total variance in BMD—as estimated by heel quantitative  
80 ultrasound (eBMD). Next, meta-analysis identified 13 bone fracture loci in ~1.2M individuals,  
81 which were also associated with BMD. We then developed “STARLinG”, a method to identify  
82 Target Genes from cell-specific genomic landscape features, including chromatin conformation  
83 and accessible chromatin sites. STARLinG identified Target Genes that were strongly enriched  
84 for genes known to influence bone density and strength (maximum odds ratio = 58,  $P = 10^{-75}$ ).  
85 We next performed rapid throughput skeletal phenotyping of 126 knockout mice lacking eBMD  
86 Target Genes and showed that these mice had an increased frequency of abnormal skeletal  
87 phenotypes compared to 526 unselected lines ( $P < 0.0001$ ). In-depth analysis of one such  
88 Target Gene, *DAAM2*, showed a disproportionate decrease in bone strength relative to  
89 mineralization, indicating impaired bone quality. This comprehensive human and murine genetic  
90 atlas provides empirical evidence testing how to link associated SNPs to causal genes, offers  
91 new insights into osteoporosis pathophysiology and highlights opportunities for drug  
92 development.

## 93 Introduction

94 Osteoporosis is a common, aging-related disease characterized by decreased bone strength  
95 and consequent increased risk of fracture.<sup>1</sup> Bone mineral density (BMD), the most clinically  
96 relevant risk factor when diagnosing osteoporosis, is highly heritable<sup>2</sup> and is a strong risk factor  
97 for fracture.<sup>3</sup> While there have been no large-scale genome-wide association studies (GWAS)  
98 for fracture to date, previous GWAS for BMD have demonstrated that BMD is a highly polygenic  
99 trait.<sup>2</sup> Recently, we identified 203 loci associated with estimated BMD by measuring quantitative  
100 heel ultrasound (eBMD), explaining 12% of its variance, demonstrating this polygenicity.<sup>4</sup>

101  
102 eBMD is predictive of fracture and is highly heritable (50-80%).<sup>5-9</sup> While BMD measured from  
103 dual-energy X-ray absorptiometry (DXA)-scanning is most often used in clinical settings, our  
104 recent GWAS for eBMD identified 84% of all currently known genome-wide significant loci for  
105 DXA-BMD<sup>4</sup> and effect sizes were concordant between the two traits (Pearson's  $r = 0.69$  for  
106 lumbar spine and 0.64 for femoral neck).<sup>4</sup> The largest GWAS to date for DXA-derived BMD  
107 measures contained only 66,628 individuals.<sup>10</sup> Both ultrasound and DXA-derived BMD are  
108 strongly associated with fracture risk where a standard deviation decrease in either metric is  
109 associated with approximately a ~1.5-fold increase in the risk of osteoporotic fracture,<sup>3,11</sup> and  
110 both traits are highly polygenic.

111  
112 Little is known about how to reliably map associated genomic loci to their causal genes.  
113 However, highly polygenic traits such as bone density offer the opportunity to empirically test  
114 which methods link associated SNPs to genes enriched for causal proteins. Causal proteins can  
115 be identified in human clinical trials when their manipulation by medications leads to changes in  
116 BMD.<sup>2</sup> Another source of causal proteins is Mendelian genetic conditions, which may constitute  
117 human knockouts and can also strongly implicate key genes that underlie bone physiology.<sup>12</sup>  
118 Given a sufficient number of associated loci, the different genomic characteristics that link a  
119 SNP to these causal proteins can be tested. These include genomic landscape characteristics  
120 such as cell-specific 3-dimensional (3D) contact domains, cell-specific open chromatin states,  
121 physical proximity and the presence of coding variation. Furthermore, samples from knockout  
122 mice generated by large-scale programs, such as the International Knockout Mouse Consortium  
123 (IKMC), can be used to identify genes whose deletion results in an abnormal skeletal  
124 phenotype. This rapid-throughput phenotyping data can then be used to determine whether  
125 outlier bone phenotypes are enriched in mice harboring deletions of genes identified by GWAS  
126 in humans.

127  
128 Here, we present the most comprehensive investigation of human and murine genetic  
129 influences on bone density and fracture to date. We not only undertook a GWAS of 426,824  
130 individuals for eBMD in the UK Biobank, explaining 20% of its variance and identifying 301  
131 novel loci, but also identified the genetic determinants of fracture in up to 1.2 million individuals  
132 combining the UK Biobank and 23andMe cohorts. We then assessed the SNP-level and  
133 genomic landscape characteristics that mapped associated SNPs to genes that were enriched  
134 for known bone density proteins. We call this approach STARLinG (SNPs to Target Genes),  
135 which identified Target Genes that are enriched up to 58-fold for known causal genes. We next  
136 showed that STARLinG also strongly enriched for genes differentially expressed in *in vivo*  
137 osteocytes compared to bone marrow cell models. Finally, we investigated whether deletion of  
138 GWAS-identified genes resulted in skeletal abnormalities *in vivo* by undertaking rapid-  
139 throughput phenotyping of knockout mice, which included 126 Target Genes identified by  
140 STARLinG. Mice harboring deletions of these 126 Target Genes were strongly enriched for  
141 outlier skeletal phenotypes. A convergence of human genetic, murine genetic, *in vivo* bone-cell  
142 expression and *in vitro* cell culture data all pointed to a role for *DAAM2* in osteoporosis. This  
143 was further investigated by detailed analysis of mice with a hypomorphic allele of *Daam2*.

144 *Daam2* knockdown resulted in a marked decrease in bone strength and increase in cortical  
145 bone porosity. CRISPR/Cas9-mediated edits of *DAAM2* in osteoblast cell lines demonstrated a  
146 reduction in mineralization, compared to un-edited cells.

147

148 These newly discovered loci will empower future clinical and pharmacological research on  
149 osteoporosis, spanning from a better understanding of its genetic susceptibility to, potentially,  
150 biomarker discovery and drug targets. Moreover, to maximize the utility of these results to the  
151 community, all data are made freely available via web resources (see URLs). Below we  
152 summarize the key results from our investigations.

153

## 154 **Results**

### 155 **GWAS for eBMD and Fracture**

156 We selected 426,824 White-British individuals (55% female) for the eBMD GWAS from the UK  
157 Biobank full release ([Online Methods](#), [Table S1](#) and [Figure S1](#)). We analyzed 13,737,936  
158 autosomal and X-chromosomal SNPs for their association with eBMD. Although there was  
159 substantial inflation of the test statistics relative to the null for eBMD ( $\lambda_{GC} = 2.36$ , [Figure S2](#)),  
160 linkage disequilibrium (LD) score regression indicated that the majority of inflation was due to  
161 polygenicity rather than population stratification (LD score regression intercept = 1.05 [0.074],  
162 ratio = 0.014 [0.021]).

163

164 We identified 1,103 conditionally independent signals (423 novel) at a genome-wide significant  
165 threshold ( $P < 6.6 \times 10^{-9}$  see [Online Methods](#)) mapping to 515 loci (301 novel) ([Table S2](#) and  
166 [Figure 1](#)). Of the conditionally independent lead SNPs at each locus, 4.6% were rare, having a  
167 minor allele frequency (MAF)  $\leq 1\%$ , whereas 9.3% were low-frequency (MAF  $\leq 5\%$  but  $> 1\%$ )  
168 and 86.1% were common (MAF  $> 5\%$ ) ([Figure S3](#) shows the relationship between MAF and  
169 absolute effect size). The average absolute conditional effect sizes for these three categories of  
170 SNPs were 0.14, 0.04 and 0.02 standard deviations, respectively. The total variance explained  
171 by conditionally independent genome-wide significant lead SNPs for eBMD was 20.3%. When  
172 partitioning the variance explained by genome-wide significant lead SNPs into the three MAF  
173 categories, we found that rare variants explained 0.8% of the variance, whereas low-frequency  
174 and common variants explained 1.7% and 17.8% of the variance in eBMD, respectively. We  
175 found strong correlations between effect sizes for eBMD when compared to effect sizes from  
176 the interim release of UK Biobank data ( $r = 0.93$ , [Figure S4](#), [Table S3](#)).

177

178 We identified 53,184 fracture cases (60% female) and 373,611 controls (54% female), totalling  
179 426,795 individuals in UK Biobank ([Table S1](#)). We assessed 13,977,204 autosomal and X-  
180 chromosomal SNPs for their effects on fracture and identified 14 conditionally independent  
181 signals associated with fracture mapping to 13 loci ([Table S4](#) and [Figure S5](#)). Once again, we  
182 observed inflation of the test statistics, ( $\lambda_{GC} = 1.2$ ). However, this was also likely due to  
183 polygenicity, rather than population stratification (LD score regression intercept = 1.025 [0.013],  
184 ratio = 0.103 [0.053]). Conditionally independent genome-wide significant lead SNPs were  
185 tested for replication in a cohort of research participants from 23andMe, Inc., a personal  
186 genetics company (N = 367,900 cases and 363,919 controls). All SNPs showed strong  
187 evidence of replication ([Table S4](#)). All genome-wide significant fracture SNPs were also found  
188 to be genome-wide significant in their association with eBMD in the expected direction of effect  
189 (i.e. alleles lowering eBMD were related to higher risk of fracture). Further, there was a high  
190 correlation between the effect sizes of eBMD associated variants and their effects on fracture  
191 were highly negatively correlated ( $r = -0.77$  [-0.79, -0.74], [Figure S4](#)).

192

### 193 **Sex Heterogeneity**

194 To investigate whether the genetic aetiology of eBMD differed between the sexes, we  
195 performed tests of sex heterogeneity across the genome. We identified 45 variants at 7 loci that  
196 displayed strong evidence of a sex difference ( $P < 6.6 \times 10^{-9}$ , **Table S5**). Variants at two of these  
197 7 loci did not reach genome-wide significance in males, females or the main eBMD GWAS, and  
198 were therefore not followed up further (**Figure S6** and **Table S5**). Of the five remaining loci  
199 (**Table S5**), we detected evidence of a sex difference at *FAM9B*, a known male-only eBMD  
200 associated locus that may mediate its effect on bone through both serum testosterone levels  
201 and estradiol levels in men.<sup>13,14</sup> Alleles at this locus associated with increased testosterone  
202 levels were also associated with increased eBMD in males only. For the remaining loci, male-  
203 only effects were detected at *FKBP4* and *RNU6ATAC*. *FKBP4* codes for a tetratricopeptide  
204 repeat protein found in steroid receptor complexes that has been implicated in androgen  
205 receptor mediated signalling and function.<sup>15</sup> Variants at the *LOC105370177* (upstream of the  
206 *OPG* gene) and *ABO* loci were associated with eBMD in both sexes, but were more strongly  
207 related in males. Finally, variants within *MCM8* were associated with eBMD in females only  
208 (**Table S6**). The same variants are known to be associated with onset of menopause<sup>16</sup> in the  
209 predicted direction (i.e. alleles which increase age at menopause associate with increased  
210 eBMD). Interestingly, 164 loci that reached genome-wide significance in the main analysis  
211 showed evidence of sex-heterogeneity in effect size far above expectation (164 out of 1106  
212 SNPs had  $P < 0.05$ , **Table S7**). Despite these differences in men and women, LD score  
213 regression analyses suggested that on average the genetic architecture influencing male and  
214 female eBMD was largely shared ( $r_G = 0.98$ ,  $SE = 0.02$ ).<sup>17</sup> The total number of genome-wide  
215 significant conditionally independent lead SNPs becomes 1,106 mapping to 518 loci when  
216 including our sex heterogeneity analyses, however, we focus on results from the main GWAS  
217 for the rest of our study.

### 218 219 **Coding Variants**

220 Most genome-wide significant associations to date have arisen from non-coding variants, which  
221 has made the identification of causal genes difficult.<sup>12</sup> Genetic association signals at coding  
222 variation can more directly highlight a potentially causal gene. We identified 1,237 coding  
223 variants, based on the Variant Effect Predictor<sup>18</sup>, meeting genome-wide levels of significance in  
224 their association with eBMD, prior to conditioning on other the lead SNPs in LD at each locus.  
225 This represents 1.0% of the total count of genome-wide significant variants (**Table S8**). The  
226 average absolute effect size for coding variants was 0.025 standard deviations (interquartile  
227 range: 0.014 – 0.027), which was approximately equal to the absolute effect size for genome-  
228 wide significant common variants. These coding variants do not necessarily directly implicate a  
229 gene but may reflect non-causal associations through linkage disequilibrium with other common  
230 non-coding causal variants.

### 231 232 **STARLinG: Fine-Mapping Associated Loci**

233 In order to map SNPs to potentially causal genes, we first refined the set of associated SNPs at  
234 each locus to a smaller set using two statistical fine-mapping methods, GCTA-COJO<sup>19</sup> and  
235 FINEMAP<sup>20</sup>. These methods identify sets of SNPs based on their conditional independence and  
236 posterior probability for causality, respectively. We generated such sets for each genome-wide  
237 significant autosomal locus by identifying conditionally independent lead SNPs, or those SNPs  
238 having a high posterior probability of causality, as determined by  $\log_{10}$  Bayes factor  $> 3$  (**Figure**  
239 **2a**). Here we refer to the set of “fine-mapped SNPs” as those SNPs achieving either conditional  
240 independence or a high posterior probability for causality.

241  
242 Prior to fine-mapping, we identified on average 235 genome-wide significant SNPs per locus.  
243 After this fine-mapping exercise, an average of two conditionally independent SNPs and five  
244 SNPs with a  $\log_{10}$  Bayes factor  $> 3$  remained per locus (**Tables S9** and **S10**). The number of

245 fine-mapped SNPs per locus ranged between 1 to 81. As a sensitivity test, we also considered a  
246 more lenient inclusion criterion for inclusion of SNPs based on a  $\log_{10}$  Bayes factor  $> 2$ , which  
247 resulted in a sharp increase in the average number of SNPs per locus to 27, which in total  
248 comprised 13,742 unique SNPs (**Table S11**).

249

### 250 ***STARLinG: Comparing Fine-Mapped SNPs for Biological Activity***

251 Given the large number of associated SNPs per locus, downstream analyses should focus on  
252 those SNPs most likely to have a biological function. We used accessible chromatin sites  
253 surveyed in a relevant cellular context as a proxy for biological activity. We generated ATAC-  
254 seq maps in the human osteosarcoma cell line SaOS-2. SaOS-2 cells possess osteoblastic  
255 features and can be fully differentiated into osteoblast-like cells. We also analyzed DNase I  
256 hypersensitive site (DHS) maps from human primary osteoblasts generated by the ENCODE  
257 project.<sup>21</sup> Both ATAC-seq and DHS data were analyzed using a uniform mapping and peak-  
258 calling algorithm (**Online Methods**).

259

260 We then analyzed the fine-mapped SNPs for enrichment of these functional signatures relative  
261 to all SNPs in the 1 Mbp surrounding each genome-wide significant association locus. Fine-  
262 mapped SNPs, including the set of conditionally independent SNPs and SNPs with  $\log_{10}$  Bayes  
263 factors  $> 3$ , were strongly enriched for both missense variants in protein coding regions and  
264 osteoblast accessible chromatin sites (**Figure 3a**). As the  $\log_{10}$  Bayes factor threshold  
265 increased, fold-enrichment increased as well (**Figure 3b**). This indicates that the fine-mapped  
266 set of SNPs is highly enriched for genomic signatures of function, which can inform the choice  
267 of statistical cut-off for selection of SNPs for follow-up functional studies.

268

### 269 ***STARLinG: Mapping Fine-Mapped SNPs to Target Genes & Enrichment for Positive 270 Control Genes***

271 Human genetic associations have rarely been translated to improved clinical care, primarily  
272 because causal genes at associated loci have not been indisputably identified. We therefore  
273 sought to test which genomic features link associated SNPs to genes known to influence bone  
274 biology in humans. We identified a set of proteins whose perturbation through  
275 pharmacotherapy<sup>2</sup> or Mendelian disease leads to changes in bone density or strength.  
276 Mendelian disease genes were defined as monogenic disorders characterized with altered bone  
277 mass or abnormal skeletal mineralization, osteolysis and/or skeletal fragility or osteogenesis  
278 imperfecta (**Table S12**) and constitute an informative human knockout resource.<sup>22</sup> We  
279 considered such proteins to be products of “positive control” genes influencing bone density and  
280 likely critical to bone biology.

281

282 Next, we investigated which genomic features linked the fine-mapped set of SNPs to positive  
283 control genes for bone density. We tested whether positive control genes were enriched among  
284 six types of genomic characteristics that can link a SNP to a gene: 1) Genes that were most  
285 proximal to the fine-mapped set SNPs; 2) Genes that contained fine-mapped SNPs overlapping  
286 their gene bodies; 3) Genes containing fine-mapped SNPs that are coding variants; 4) Genes  
287 identified to be in 3D contact with fine-mapped sets in human osteoblasts or osteocytes through  
288 high-throughput chromatin conformation capture (Hi-C) experiments; 5) The closest gene to  
289 fine-mapped SNPs, which also mapped to ATAC-seq peaks in human osteoblast SaOS-2 cell  
290 lines; and 6) Those genes within 100 kbp of fine-mapped SNPs (**Figure 2b** emphasizes the  
291 target gene selection and **Figure 4** details this entire pipeline). Coding annotations, ATAC-seq  
292 peaks, and Hi-C interaction peaks were not combined but kept separate to enable different  
293 sources of data to provide converging and confirmatory evidence. Distance from a fine-mapped  
294 SNP to a gene was considering the closer of the 3' and 5' ends, not the transcription start site.

295 We named these genes “Target Genes” and tested which of the above 6 methods to define  
296 Target Genes was most strongly enriched for positive control genes.

297  
298 The set of Target Genes that were most strongly enriched for positive control genes, arose from  
299 genes targeted by SNPs that were conditionally independent and by SNPs identified to be  
300 plausibly causal with a  $\log_{10}$  Bayes factor  $> 3$  (**Table 1 and Table S13**). All six different methods  
301 for linking these fine-mapped set of SNPs to Target Genes yielded strong enrichment for  
302 positive control genes. The odds ratios ranged from 5.1 (95% CI: 3.0-8.6,  $P = 10^{-11}$ ) for Target  
303 Genes within 100 kbp of the fine-mapped SNPs to an odds ratio of 58.5 (95% CI: 26.4-129.31,  
304  $P = 10^{-75}$ ) for Target Genes closest to fine-mapped SNPs that were in an osteoblast-derived  
305 ATAC-seq peak (**Table 1**). In addition, we used FUMA<sup>23</sup> to assess which pathways from the  
306 WikiPathways<sup>24</sup> database were identified by the set of Target Genes most strongly enriched for  
307 positive control genes. We observed that well known pathways such as Wnt signalling,  
308 endochondral ossification, osteoclast and osteoblast signalling, as well as novel pathways were  
309 highlighted by this approach (**Figure S7**).

310  
311 These results suggest that STARLinG leads to strong enrichment for positive control genes  
312 known to be central to bone biology. Such methods may help to prioritize genes at associated  
313 loci for functional testing, which are more likely to influence bone biology and therefore, have  
314 clinical relevance. The full list of mapped Target Genes and the method through which they  
315 were identified is presented in **Table S14**.

### 316 317 **Mapping Fine-Mapped SNPs to Osteocyte-Signature Genes**

318 An alternative method to assess the biological plausibility of Target Genes is to test whether  
319 their expression is enriched in bone cells. Osteocytes are the most abundant cell type in bone  
320 and are key regulators of bone mass, bone formation and bone resorption.<sup>25</sup> We therefore  
321 assessed the transcriptome of primary murine osteocytes derived from three bone types *in*  
322 *vivo*.<sup>26</sup> Genes enriched for expression in osteocytes and expressed in all bone types defined an  
323 osteocyte transcriptome signature.<sup>26</sup> We then tested which of the methods used to identify  
324 eBMD Target Genes resulted in the greatest enrichment for osteocyte-signature genes.

325  
326 Again, we found that STARLinG-identified Target Genes were strongly enriched for osteocyte  
327 signature genes, with odds ratios for enrichment ranging from 2.1 (95% CI: 1.7-2.5,  $P = 2 \times 10^{-17}$ )  
328 for Target Genes within 100 kbp of the fine mapped set of SNPs, to 7.4 (95% CI: 3.8-14.5,  $P =$   
329  $5 \times 10^{-12}$ ) for Target Genes mapped through fine-mapped coding SNPs (**Table 2 and Table S15**  
330 **and S16**). This again suggests STARLinG results in enrichment for biologically relevant genes.

### 331 332 **A Large-Scale High Throughput Murine Knockout Screening Program**

333 The Origins of Bone and Cartilage Disease (OBCD) program ([www.boneandcartilage.com](http://www.boneandcartilage.com)) is  
334 determining 19 structural and functional parameters in all unselected knockout mouse lines  
335 generated at the Wellcome Trust Sanger Institute for the IKMC and IMPC. These parameters  
336 evaluate bone mineral content (BMC), 3D trabecular and cortical bone structure, bone  
337 mineralization and femoral and vertebral bone strength. To date, the OBCD program has  
338 included the analysis of 126 knockout lines with mutations of Target Genes (**Table S17**). Outlier  
339 phenotypes were defined as structural or strength parameters  $> 2$  standard deviations away  
340 from the reference mean, determined from over 300 age-matched, sex-matched and genetically  
341 identical C57BL/6N wild-type controls (**Online Methods**). We investigated whether deletion of  
342 these 126 Target Genes resulted in enrichment of outlier skeletal phenotypes. Outlier cortical  
343 and trabecular bone phenotypes were more frequent in mice with disruptions of the 126 Target  
344 Genes compared against 526 unselected knockout lines (**Tables S17 and S18**, OR 3.2 [95%  
345 CI: 1.9-5.6],  $P < 0.0001$ ). Therefore, enrichment of abnormal skeletal phenotypes in mice with



346 disruption of Target Genes provides clear functional validation that our fine-mapping approach  
347 identifies critical and biologically-relevant skeletal genes. Our fine-mapping *in vivo* and *in vitro*  
348 data converged to identify *DAAM2* as a highly credible and novel osteoporosis gene, therefore  
349 we undertook detailed analyses of mice with a hypomorphic *Daam2* allele to illustrate the  
350 potential of this approach.

351

### 352 ***In-Depth Characterization of DAAM2***

353 Numerous lines of evidence identified *DAAM2* as an important gene for further functional  
354 investigation. First, a conditionally independent lead SNP, rs2504101, mapped directly to  
355 *DAAM2* ( $P_{\text{conditional}} = 4.3 \times 10^{-10}$ ) and second, fine-mapping revealed two coding missense  
356 variants with high posterior probabilities for causality, rs201229313 in its 19<sup>th</sup> exon ( $\log_{10}$  BF =  
357 3.7), and rs61748650 in its 21<sup>st</sup> exon ( $\log_{10}$  BF = 2.5). Third, a rare variant, rs772843886, near  
358 *DAAM2* was suggestively associated with risk of fracture ( $P = 2 \times 10^{-3}$ ). Fourth, the *Daam2*<sup>tm1a/tm1a</sup>  
359 mouse was identified to have an outlier skeletal phenotype in our rapid throughput murine  
360 knockout screening program (**Table S17**). Fifth, although *DAAM2* has not previously been  
361 implicated in osteoporosis, it has been predicted to have a role in canonical Wnt signaling.<sup>27,28</sup>

362

363 To investigate the role of *DAAM2* in bone biology, we first tested its expression in bone cells.  
364 We performed RNA-seq and ATAC-seq experiments in four different human osteoblast cell lines  
365 and found it was expressed in all cell lines (**Online Methods, Figure S8**). Staining experiments  
366 in the SaOS-2 cell line revealed *DAAM2* localized specifically in the cell nuclei (**Figures S9 and**  
367 **S10**). This functional evidence from human bone cells also led us to characterize *Daam2* in  
368 mouse bone cells. *Daam2* was identified as an osteocyte signature gene (**Table S16**) and was  
369 expressed in mouse calvarial osteoblasts and bone marrow-derived osteoclasts (**Table S19**).

370

371 Next using CRISPR/Cas9, we tested the effect on bone mineralization of double-stranded  
372 breaks (DSBs) in the second exon of *DAAM2* in SaOS-2 osteoblast cell lines (**Online**  
373 **Methods**). We found that after 14 days of treatment with osteogenic factors, control cells  
374 transfected with the intact plasmid, but not undergoing an DSB of the *DAAM2* gene, had a 9-fold  
375 increase in mineralization. After the introduction of a DSB in the second exon of *DAAM2*,  
376 induced mineralization was severely impaired (**Figure 5**). These CRISPR/Cas9-based findings  
377 suggest that *DAAM2* influences mineralization capacity in human osteoblasts.

378

379 We next analyzed the skeletal phenotypes of *Daam2*<sup>tm1a/tm1a</sup>, *Daam2*<sup>+tm1a</sup> and wild-type  
380 littermate mice in detail. Adult male *Daam2*<sup>tm1a/tm1a</sup> mice had reduced femur and vertebral bone  
381 mineral content (BMC), while male *Daam2*<sup>+tm1a</sup> and female *Daam2*<sup>tm1a/tm1a</sup> mice also had  
382 reduced vertebral BMC. These changes were accompanied by a small reduction in femur length  
383 in *Daam2*<sup>tm1a/tm1a</sup> mice (males, 2.7%; females, 3.5%). Despite otherwise normal trabecular and  
384 cortical bone structural parameters, cortical porosity was increased in both male and female  
385 *Daam2*<sup>tm1a/tm1a</sup> mice (**Figure S11**).

386

387 Consistent with their increased cortical porosity, *Daam2*<sup>tm1a/tm1a</sup> mice had markedly reduced  
388 bone strength (**Figure 6**) even though all other cortical bone parameters, including BMD, were  
389 normal (**Figure S11**). Bone quality is the term used to describe properties of bone composition  
390 and structure that contribute to strength independently of BMD. Bone quality was thus  
391 investigated in *Daam2*<sup>tm1a/tm1a</sup> mice by comparing *Daam2*<sup>tm1a/tm1a</sup> mineralization and  
392 biomechanical parameters with values predicted by linear regression analysis of over 300 wild-  
393 type age, sex and genetic background matched wild-type controls. Measures of bone quality in  
394 *Daam2*<sup>tm1a/tm1a</sup> mice were reduced compared to wild-type mice, and vertebral stiffness was > 2  
395 standard deviations below that predicted even after accounting for reduced BMC (**Figure 6c**  
396 **and Table S20**). To investigate the role of *Daam2* on bone turnover, we measured markers of

397 bone resorption (TRAP) and formation (P1NP) in 10-week-old *Daam2*<sup>tm1a/tm1a</sup> and *Daam2*<sup>+tm1a</sup>  
398 mice, and these did not differ from wild-type (**Figure S12**). Furthermore, primary cultures of  
399 bone marrow mononuclear cells from *Daam2*<sup>tm1a/tm1a</sup> mice showed no difference in  
400 osteoclastogenesis, and primary osteoblast mineralization was also similar to wild-type (**Figure**  
401 **S12**).

402  
403 Male *Daam2*<sup>tm1a/tm1a</sup> mice had decreased mineral content per unit matrix protein and increased  
404 carbonate substitution (**Figure S13**). This decrease in mineral to matrix ratio explains the overall  
405 decrease in bone mineral content observed in the absence of a decrease in cortical bone size.  
406 While bone size and geometry play a major role in controlling bone strength, decreases in  
407 mineral to matrix ratio are associated with decreased bone stiffness and decreased bending  
408 moment.<sup>29</sup> These decreases in bone composition likely contributed to the poor bone quality  
409 observed in the *Daam2*<sup>tm1a/tm1a</sup> mice.

410  
411 Taken together, these data suggest the decreased bone strength in *Daam2*<sup>tm1a/tm1a</sup> mice is not  
412 simply a result of abnormal bone turnover, but also a consequence of increased porosity and  
413 impaired bone quality. If DAAM2 proves to be a tractable drug target, such an agent would  
414 represent a complementary therapeutic strategy for prevention and treatment of osteoporosis  
415 and fragility fracture.

#### 416 **Additional Novel Candidate Bone Genes**

417 While *DAAM2* represents the detailed validation of a novel Target Gene and the rapid-  
418 throughput knockout mouse skeletal phenotyping pipeline, we also highlight five additional  
419 eBMD Target Genes that result in contrasting abnormalities of bone structure and strength  
420 when deleted in mice, thus emphasising their functional role in skeletal physiology and  
421 importance for further study.

422  
423 *CBX1* encodes Chromobox 1, a highly conserved non-histone member of the heterochromatin  
424 protein family that mediates gene silencing but has no reported role in the skeleton<sup>30</sup>.  
425 Homozygous deletion of *Cbx1* resulted in embryonic lethality whereas adult heterozygous mice  
426 had increased bone mineral content and trabecular thickness resulting in increased stiffness  
427 and strength (**Table S17, Figure S14**). *CBX1* was identified by five SNPs with log<sub>10</sub> BF<sub>s</sub> > 2  
428 mapping directly to its gene body (**Table S11**) and rs208016 (70 kbp upstream) suggested an  
429 association with fracture (P = 1.5x10<sup>-5</sup>).

430  
431 *WAC* encodes WW Domain Containing Adaptor with Coiled-Coil, a protein of unknown function  
432 that is associated with global developmental delay and dysmorphic features in Desanto-Shinawi  
433 syndrome<sup>31</sup>. Homozygous deletion of *Wac* resulted in prenatal lethality whereas adult  
434 heterozygous mice had increased bone length, mass and strength (**Table S17, Figure S15**).  
435 Seven fine-mapped SNPs mapped proximally or directly to *WAC* (**Table S11**), with two fine-  
436 mapped SNPs, rs17686203 (log<sub>10</sub> BF = 3.1) and rs61848479 (log<sub>10</sub> BF = 3.9) mapping to  
437 *WAC* promoter Hi-C interaction peaks in primary human osteoblasts, and for the latter SNP in  
438 primary human osteocytes (**Table S14**). We also identified rs17753457 (60 kbp downstream)  
439 that had a suggestive association with fracture (P = 4.3x10<sup>-5</sup>).

440  
441 *DSCC1* encodes DNA Replication and Sister Chromatid Cohesion 1, a component of an  
442 alternative replication factor that facilitates binding of proliferating cell nuclear antigen to DNA  
443 during S phase but has no known role in bone<sup>32</sup>. Homozygous knockout mice had reduced  
444 viability and adult *Dscc1*<sup>+/-</sup> heterozygotes had increased bone mineral content and strength  
445 (**Table S17, Figure S16**). *DSCC1* was identified by rs62526622 (log<sub>10</sub> BF = 2.0) mapping to an  
446 intronic *DSCC1* Hi-C promoter interaction peak in primary human osteoblasts. rs546691328  
447

448 (180 kbp downstream) was also found to have a suggestive association with fracture ( $P =$   
449  $2.9 \times 10^{-4}$ ).

450  
451 *RGCC* encodes Regulator of Cell Cycle, a p53 Target Gene that interacts with polo-like kinase  
452 1, which regulates cell proliferation and apoptosis but has no documented role in the skeleton<sup>33</sup>.  
453 Nevertheless, *Rgcc*<sup>-/-</sup> knockout mice displayed increased bone mineral content and strength  
454 (**Table S17, Figure S17**). *RGCC* was identified by rs145922919 ( $\log_{10}$  BF = 3.3) mapping  
455 approximately 30 kbp upstream of *RGCC* to a Hi-C promoter interaction peak in primary human  
456 osteoblasts and rs545753481 (32 kbp upstream) also had a suggestive association with fracture  
457 ( $P = 3.4 \times 10^{-3}$ ).

458  
459 *YWHAE* encodes Tyrosine 3-Monooxygenase/Tryptophan 5-Monooxygenase Activation Protein,  
460 Epsilon Isoform, a pro-inflammatory cytokine that mediates signal transduction by binding to  
461 phosphoserine-containing proteins. *YWHAE* (14-3-3 $\epsilon$ ) binds to aminopeptidase N (CD13) to  
462 regulate chondrocyte homeostasis and has been implicated as a novel therapeutic target in  
463 osteoarthritis<sup>34</sup>. Rare *YWHAE* deletions have been reported in Miller-Dieker Lissencephaly  
464 syndrome which includes craniofacial abnormalities and growth retardation together with diverse  
465 neurodevelopmental abnormalities<sup>35</sup>. Consistent with this, homozygous deletion of *Ywhae*  
466 resulted in reduced bone length, and increased bone mass and mineral content resulting in  
467 brittle bones (**Table S17, Figure S18**). *YWHAE* was identified in our target gene approach by  
468 22 SNPs with  $\log_{10}$  BF $s > 2$  (**Table S11**) all mapping directly to *YWHAE* introns and an  
469 additional SNP, rs181451348 (1 kbp downstream) showed suggestive association with fracture  
470 ( $P = 7.1 \times 10^{-5}$ ).

471  
472 *CBX1*, *DSCC1*, *RGCC*, *WAC*, and *YWHAE* represent strong candidates for further in-depth  
473 functional characterization as we have performed for *DAAM2*. Bone quality screens identified  
474 *WAC* and *DSCC1* as femur bone quality outliers due to *Wac*<sup>+/-</sup> and *Dsc1*<sup>+/-</sup> knockout mice being  
475 at least two standard deviations from the expected range (**Figure S19**). Our data also support  
476 functional experiments in human cells as all five genes were expressed in all four human  
477 osteoblast cell lines we profiled with RNA-seq and ATAC-seq (**Online Methods**), except for  
478 *RGCC* which was highly expressed in SaOS-2 with low expression levels in U2OS, MG63, and  
479 HOS. In addition, we observed suggestive association at each locus with fracture (**Table S21**),  
480 further supporting evidence for these five genes having roles in human bone biology.

## 481 482 **Discussion**

483 In this, the most comprehensive human and murine study on the genetic determinants of bone  
484 density and fracture performed to date, we have identified a total of 518 genome-wide  
485 significant loci, of which 301 are novel and together explain 20% of the total variance in eBMD.  
486 In a GWAS meta-analysis of up to 1.2 million individuals, 13 fracture loci were identified, all of  
487 which were also associated with eBMD. Taking advantage of the polygenicity of eBMD, we  
488 developed STARLinG and demonstrated strong biological enrichment for fine-mapped SNPs in  
489 bone cell open chromatin. Using fine-mapped SNPs we found that Target Genes, identified  
490 through the STARLinG approach, were strongly enriched for genes that are known to play  
491 central roles in bone biology through Mendelian genetics, or as targets for clinically-validated  
492 osteoporosis therapies. High throughput skeletal phenotyping of mice with deletions of 126  
493 Target Genes revealed enrichment of outlier skeletal phenotypes compared to analysis of 526  
494 unselected knockout lines. Last, we identified *DAAM2* as a protein with critical effects on bone  
495 strength, porosity and quality. These findings will enable on-going and future studies to better  
496 understand the genomic characteristics that link fine-mapped SNPs to sets of genes enriched  
497 for causal proteins. Further, this comprehensive study of the genetic variants associated with  
498 osteoporosis will provide opportunities for biomarker and drug development

499  
500 The polygenicity of eBMD is striking. Few traits and diseases currently have hundreds of loci  
501 associated at genome-wide levels of significance.<sup>12,36</sup> This has led to a large proportion of total  
502 variance in eBMD being explained by now known genetic determinants, which will facilitate  
503 future exploration of bone biology and enable drug development for osteoporosis.<sup>37</sup> Yet, despite  
504 the large number of genetic and biological inputs into eBMD determination, pharmacological  
505 perturbation of even only one protein identified in our GWAS can have clinically relevant effects.  
506 For example, RANKL inhibition has been shown to increase bone density by up to 21% after ten  
507 years of therapy.<sup>38</sup> Interestingly, the genetic variants near RANKL have small effects on eBMD.  
508 Thus, despite the small effect sizes for most identified variants, these do not necessarily reflect  
509 the effect sizes to be anticipated by pharmacological manipulation of the protein. This is  
510 because common genetic variants tend to have small effects on protein function, whereas  
511 pharmacotherapies tend to have large effects on protein function. Consequently, the dose-  
512 response curve describing the effect of small and large genetic perturbations on eBMD is  
513 needed to decide which proteins to target for drug development.<sup>12</sup>

514  
515 Polygenicity has also improved our statistical power to validate STARLinG, which aims to link an  
516 associated locus with a potentially causal gene. We found that fine-mapped sets of SNPs were  
517 able to identify Target Genes that were strongly enriched for positive control genes—particularly  
518 when the STARLinG approach implemented relatively simple strategies, such as the nearest  
519 gene, or the gene nearest a fine-mapped SNP in cell-relevant open chromatin. We also  
520 observed that fine-mapped SNPs were often in 3D contact with Target Genes in human  
521 osteoblasts and osteocytes. These rich data, surveying many genomic landscape features  
522 provide guidance for investigators attempting to identify causal genes from GWAS-associated  
523 SNPs and all human genetic and murine results are available for download (see URLs).

524  
525 The marked reduction in bone strength in *Daam2*<sup>tm1a/tm1a</sup> mice, despite minimal changes in bone  
526 morphology and mineral content, indicates that *Daam2*<sup>tm1a/tm1a</sup> mice have abnormal bone quality,  
527 which can be explained in part by increased cortical porosity. Further, CRISPR/Cas9-mediated  
528 knockouts of *DAAM2* in osteoblast cells lines resulted in a marked reduction in inducible  
529 mineralization. Few such genes have been identified and further investigations will be required  
530 to determine whether *DAAM2* represents a tractable drug target in humans. Nevertheless,  
531 previous studies have suggested that *DAAM2* indirectly regulates canonical Wnt signalling  
532 across several developmental processes.<sup>27,28</sup>

533  
534 Our GWAS for fracture risk identified 13 loci associated with this common disease. All these loci  
535 have been associated with BMD and/or eBMD, highlighting the importance of BMD as a  
536 determinant of fracture risk, at least in the age range assessed within the UK Biobank. While  
537 BMD-independent loci for fracture likely exist, these were not identified despite a well-powered  
538 study. This suggests that screening for fracture drug targets should also include understanding  
539 the effect of the protein on BMD.

540  
541 Our study has important limitations. First, we have measured eBMD, rather than DXA-derived  
542 BMD, which is typically measured in the clinic. Nonetheless, beyond their phenotypic  
543 correlation, these two traits also demonstrate high genetic concordance in terms of their  
544 genome-wide significant loci, suggesting that the biological properties that underpin these two  
545 traits are similar. Importantly, however, eBMD is a strong predictor of fracture risk in its own  
546 right, and contributes to risk assessment over and above DXA-derived BMD at the hip.<sup>39</sup> While  
547 our target gene approach has identified a set of candidate genes enriched for genes with known  
548 effects on bone density, it is important to note that there is no gold-standard set of genes known  
549 to influence BMD. While our rapid throughput mouse knockout program is on-going and will

550 investigate many of the Target Genes implicated by our study, further efforts will be required to  
551 functionally validate (or exclude) these genes in bone biology. Our target gene approach did not  
552 include human gene expression quantitative trait loci (eQTL) data. This is because the largest  
553 available eQTL experiments for human osteoblasts involve only 95 individuals,<sup>40</sup> and larger  
554 sample sizes with RNA-sequencing data will be required to properly investigate our method of  
555 linking fine-mapped sets of SNPs to genes. Finally, our program was limited to individuals of  
556 White-British genetic ethnicity and the effect of most of the genome-wide significant SNPs in  
557 other populations remains to be assessed. It is likely that on-going studies in non-British  
558 ancestries will address this question.

559  
560 In summary, we have generated an atlas of human and murine genetic influences on  
561 osteoporosis. This comprehensive study has more fully described the genetic architecture of  
562 eBMD and fracture and has identified a set of Target Genes strongly enriched for genes with  
563 known roles in bone biology. We have demonstrated the relevance of this approach by  
564 identifying *DAAM2*, a gene whose disruption in mice leads to an increase in cortical porosity and  
565 marked reductions in bone quality and strength, and in human osteoblasts leads to a decrease  
566 in mineralization. This set of Target Genes is expected to include new drug targets for the  
567 treatment of osteoporosis, a common disease for which novel therapeutic options are a health  
568 priority.

## 569 **Online Methods**

### 570 **Curating osteoporosis associated outcomes in the UK Biobank study**

571 During the period from 2006 - 2010, half a million British adults were recruited by the UK  
572 Biobank study (<http://www.ukbiobank.ac.uk/>).<sup>41</sup> Subjects provided biological samples, consented  
573 to physical measurements and answered questionnaires relating to general health and lifestyle.  
574 Ethical approval was granted by the Northwest Multi-Centre Research Ethics Committee, and  
575 informed consent was obtained from all participants prior to participation. Heel bone quality was  
576 evaluated in 487,428 subjects by quantitative ultrasound speed of sound (SOS) and broadband  
577 ultrasound attenuation (BUA) using a Sahara Clinical Bone Sonometer (Hologic Corporation,  
578 Bedford, Massachusetts, USA). Further information regarding the assessment protocols are  
579 publicly available on the UK Biobank website. Participants were initially measured at baseline (N  
580 = 487,428) and had their left calcaneus (N = 317,815), right calcaneus (N = 4,102) or both  
581 calcanei (N = 165,511) measured. A subset of these subjects was followed up at two further  
582 time points (N = 20,104 and N = 7,988), during which both heels were measured. A detailed  
583 description of the ascertainment procedure is provided in **Figure S1**. Prior to quality control,  
584 ultrasound data were available for 488,683 individuals at either baseline and/or follow-up  
585 assessment. To reduce the impact of outlying measurements we first identified subjects that  
586 had both heels measured and removed those with highly discrepant (i.e. left vs. right) SOS  
587 and/or BUA measurements. To achieve this, subjects were stratified by sex and bivariate scatter  
588 plots comparing left and right heel measures of SOS and BUA were generated separately.  
589 Outliers were identified by manual inspection and removed. The same method was used to  
590 identify and remove individuals with highly discordant SOS v BUA measured for each heel.  
591 Strict quality control was thereafter applied to male and female subjects separately using the  
592 following exclusion thresholds: SOS [Male: ( $\leq 1,450$  and  $\geq 1,750$  m/s), Female ( $\leq 1,455$  and  $\geq$   
593  $1,700$  m/s)] and BUA [Male: ( $\leq 27$  and  $\geq 138$  dB/MHz), Female ( $\leq 22$  and  $\geq 138$  dB/MHz)].  
594 Individuals exceeding the threshold for SOS or BUA or both were removed from the analysis.  
595 Estimated bone mineral density [eBMD, (g/cm<sup>2</sup>)] was derived as a linear combination of SOS  
596 and BUA (i.e.  $eBMD = 0.002592 * (BUA + SOS) - 3.687$ ). Individuals exceeding the following  
597 thresholds for eBMD were further excluded: [Male: ( $\leq 0.18$  and  $\geq 1.06$  g/cm<sup>2</sup>), Female ( $\leq 0.12$   
598 and  $\geq 1.025$  g/cm<sup>2</sup>)]. A unique list of individuals with a valid measure for the left calcaneus (N =  
599 477,380) and/or right (N = 181,953) were identified separately across the three time points.  
600 Individuals with a valid right calcaneus measure were included in the final data set when no left  
601 measures were available, giving a preliminary working dataset of N=481,100, (left = 475,724  
602 and right = 5,376) unique individuals. Bivariate scatter plots of eBMD, BUA and SOS were again  
603 visually inspected and 723 additional outliers were removed, leaving a total of 480,377 valid  
604 QUS measures for SOS, BUA and BMD (264,304 females and 216,073 males). The R script  
605 used to curate the raw data is available on request, together with all supporting summary data  
606 and plots. Descriptive statistics of the cohort, after quality control, are detailed in **Table S1**.

607  
608 Fracture cases were identified using two mutually non-exclusive methods: Hospital Episodes  
609 Statistics linked through NHS Digital (<http://content.digital.nhs.uk/hes>) with a hospital-based  
610 fracture diagnosis irrespective of mechanism within the primary (N = 392,292) or secondary (N  
611 = 320,448) diagnosis field, and questionnaire-based self-reported fracture within the past five  
612 years (N = 501,694). We defined a set of International Classification of Diseases codes, 10<sup>th</sup>  
613 revision (ICD10), to separate fracture cases from controls with the Hospital Episodes Statistics  
614 data. We excluded fractures of the skull, face, hands and feet, pathological fractures due to  
615 malignancy, atypical femoral fractures, periprosthetic and healed fracture codes. A full list of  
616 ICD10 codes used can be found in **Table S22**. We did not exclude any self-reported fracture  
617 cases by fracture site, since participants were only asked if they sustained a fracture at ankle,  
618 leg, hip, spine, wrist, arm, other or unknown. We identified 20,122 fractures using ICD10 codes

619 and 48,818 using questionnaire-based self-reported data. Descriptive statistics of the cohort,  
620 after quality control and ancestry selection, are detailed in [Table S1](#).

621

### 622 **Ancestry assignment**

623 Genotype array data were imputed by the UK Biobank using the Haplotype Reference  
624 Consortium (HRC) panel<sup>42</sup>. A comprehensive description of the imputation protocol is described  
625 elsewhere<sup>43</sup>. A sample of 409,728 White-British individuals was identified centrally by the UK  
626 Biobank, using a combination of self-reported ethnicity and genetic information. However, the  
627 reliance on self-reported information was deemed too conservative and we chose to redefine a  
628 White-British sample (N = 440,414) using genetic information only. We projected the UK  
629 Biobank sample onto the first 20 principal components estimated from the 1000 Genomes  
630 Phase 3 (1000G) project data<sup>44</sup> (where ancestry was known) using FastPCA version 2.<sup>45</sup>  
631 Projections used a curated set of 38,551 LD-pruned HapMap 3 Release 3 (HM3)<sup>46</sup> bi-allelic  
632 SNPs that were shared between the 1000G and UK Biobank datasets (i.e. MAF > 1%, minor  
633 allele count > 5, genotyping call rate > 95%, Hardy-Weinberg P > 1x10<sup>-6</sup>, and regions of  
634 extensive LD removed). Expectation Maximization (EM) clustering (as implemented in R using  
635 EMCluster<sup>47</sup>) was used to compute probabilities of cluster membership based on a finite mixture  
636 of multivariate Gaussian distributions with unstructured dispersion. Eigenvectors 1, 2 and 5  
637 were used for clustering as they represented the smallest number of eigenvectors that were  
638 able to resolve the British 1000G sub-population (GBR) from other ethnicities ([Figure S20](#)).  
639 Twelve predefined clusters were chosen for EM clustering as sensitivity analyses suggested  
640 that this number provided a good compromise between model fit (as quantified by log likelihood,  
641 Bayesian information criterion, and Akaike information criterion) and computational burden  
642 ([Figure S21](#)). UK Biobank participants (N = 440,414) that clustered together with the 1000G  
643 GBR sub-population were termed White-British and used for downstream genetic analyses  
644 ([Figure S22](#)).

645

### 646 **Identification of unrelated samples for LD reference estimation and X chromosome 647 analyses**

648 Genome-wide complex trait analysis (GCTA)<sup>48</sup> was used to construct a genetic relatedness  
649 matrix (GRM) using the White-British sample and a curated set of LD non-pruned HM3  
650 autosomal genome-wide variants (N = 497,687). Unrelated individuals were defined using the  
651 genome-wide relatedness measure defined by Yang *et al.*<sup>48</sup> where the pairwise relatedness  
652 between individuals *j* and *k* ( $A_{jk}$ ) was estimated by:

653

$$A_{jk} = \frac{1}{N} \sum_{i=1}^N \frac{(x_{ij} - 2p_i)(x_{ik} - 2p_i)}{2p_i(1 - p_i)}$$

654

655 where  $x_{ij}$  is the number of copies of the reference allele for the  $i^{\text{th}}$  SNP of the  $j^{\text{th}}$  and  $k^{\text{th}}$   
656 individuals and  $p_i$  is the frequency of the reference allele across the N individuals.

657

658 Two samples of unrelated individuals were defined from the White-British UK Biobank  
659 population: A sample used for X chromosome association analysis (pairwise relatedness < 0.1,  
660 N = 374,559) and a random sample for LD reference estimation (pairwise relatedness < 0.025,  
661 N = 50,000).

662

### 663 **Genome-wide association analysis**

664 A maximum of 426,824 White-British individuals (233,185 females and 193,639 males) with  
665 genotype and valid QUS measures were analyzed ([Table S1](#)). For fracture, a maximum of  
666 426,795 White-British individuals, comprising 53,184 fracture cases (60% female) and 373,611

667 controls (54% female) were analyzed. We note that the sample sizes between the two assessed  
668 traits are similar but different, due to not all fracture cases and controls having eBMD measured,  
669 and vice-versa. We tested autosomal genetic variants for association with eBMD and fracture,  
670 separately, assuming an additive allelic effect, using a linear mixed non-infinitesimal model  
671 implemented in the BOLT-LMM v2 software package<sup>49</sup> to account for population structure and  
672 cryptic relatedness. The following covariates were included as fixed effects in all models: age,  
673 sex, genotyping array, assessment center and ancestry informative principal components 1 to  
674 20. Autosomal analysis was restricted to up to 13,977,204 high quality HRC imputed variants  
675 with a MAF > 0.05%, minor allele count > 5, info score > 0.3, genotype hard call rate > 0.95, and  
676 Hardy-Weinberg equilibrium  $P > 1 \times 10^{-6}$ . We also analyzed the association between eBMD and  
677 fracture and directly genotyped SNPs on the X chromosome, adjusting for the same covariates,  
678 using the Plink2 (October 2017) software package<sup>50</sup> and a nested sample of unrelated  
679 participants (N = 362,926 for eBMD and N = 45,087 cases and 317,775 controls for fracture). As  
680 the analyses for the X chromosome data were based upon observed genotypes, we excluded  
681 SNPs with evidence of deviation from Hardy-Weinberg Equilibrium ( $P < 1 \times 10^{-6}$ ), MAF < 0.05%,  
682 minor allele count  $\leq 5$ , and overall missing rate > 5%, resulting in up to 15,466 X chromosome  
683 SNPs for analysis. Heterogeneity in effect size coefficients between sexes was tested in  
684 EasyStrata<sup>51</sup>, using Cochran's test of heterogeneity<sup>52</sup>

$$X_{het} = \sum_i [(\beta_i - \beta_{overall})^2 w_i] \sim \chi^2(m - 1)$$

685

686  $\beta$  effect size estimates of stratum  $i$

687  $SE_i$  standard error of stratum  $i$

$$w_i = 1/SE_i^2$$

688  $i = 1..m$

689

690 Manhattan plots of our genome-wide association scans were generated using the same  
691 software. We have previously estimated the genome-wide significance threshold  $\alpha = 6.6 \times 10^{-9}$  for  
692 analyzing data from the UK Biobank using the above criteria.<sup>4</sup>

693

### 694 **Fracture replication meta-analysis**

695 14 genome-wide significant conditionally independent lead SNPs identified from our fracture  
696 analyses were tested for replication in the 23andMe cohort. Genetic associations were tested  
697 against the fracture phenotype on a set of unrelated individuals of European ancestry. Analyses  
698 were adjusted for age, sex, principal components 1 to 5, and the genotyping platform. There  
699 were 367,900 cases and 363,919 controls. Meta-analysis of UK Biobank discovery and  
700 23andMe replication data was performed using METAL.<sup>53</sup> In order to compare the effect  
701 estimates and standard errors of the UK Biobank discovery and 23andMe replication data, we  
702 had to transform the UK Biobank discovery effect estimates and standard errors as per the  
703 manual specifications in the BOLT-LMM<sup>49</sup> documentation, specifically:

$$\log OR = \frac{\beta}{\mu * (1 - \mu)}$$

704 where  $\mu$  = case fraction and standard errors of SNP effect estimates should also be divided by  
705  $(\mu * (1 - \mu))$ .

706

### 707 **Approximate conditional association analysis**

708 To detect multiple independent association signals at each of the genome-wide significant  
709 eBMD and fracture loci, we applied approximate conditional and joint genome-wide association  
710 analysis using the software package GCTA v1.91.<sup>19</sup> Variants with high collinearity (multiple  
711 regression  $R^2 > 0.9$ ) were ignored and those situated more than 20 Mbp away were assumed to



712 be independent. A reference sample of 50,000 unrelated White-British individuals randomly  
713 selected from the UK Biobank was used to model patterns of linkage disequilibrium (LD)  
714 between variants. The reference genotyping dataset consisted of the same variants assessed in  
715 our GWAS. Conditionally independent variants reaching genome-wide significance were  
716 annotated to the physically closest gene using Bedtools v2.26.0<sup>54</sup> and the hg19 gene range list  
717 ([www.cog-genomics.org/plink2](http://www.cog-genomics.org/plink2)).

718

### 719 **Estimation of variance explained by significant variants and SNP heritability**

720 We estimated the proportion of eBMD phenotypic variance tagged by all SNPs on the  
721 genotyping array (i.e. the SNP heritability) using BOLT-REML<sup>49</sup> and Linkage Disequilibrium  
722 Score Regression (LDSC)<sup>55</sup>. To calculate the variance explained by independent genome-wide  
723 significant SNPs, i.e. all 1,103 genome-wide significant conditionally independent lead SNPs,  
724 we summed the variance explained per SNP using the formula:  $2p(1 - p)\beta^2$ , where  $p$  is the  
725 effect allele frequency and  $\beta$  is the effect of the allele on a standardized phenotype (mean = 0,  
726 variance = 1).<sup>56-58</sup>

727

### 728 **Estimating genomic inflation with LD Score Regression (LDSC)**

729 To estimate the amount of genomic inflation present in the data that was due to residual  
730 population stratification, cryptic relatedness, and other latent sources of bias, we used stratified  
731 LDSC<sup>59</sup> in conjunction with partitioned LD scores that were calculated for high quality HM3  
732 SNPs derived from a sample of unrelated 1000G GBR individuals.

733

### 734 **STARLinG: Fine-Mapping SNPs**

735 Fine-mapped SNPs were defined as those being conditionally independent, as identified by  
736 GCTA-COJO or exceeding our threshold for posterior probability of causality, as defined by  
737 FINEMAP. Here we describe the generation of this set of fine-mapped SNPs.

738

739 First, SNPs were defined as being conditionally independent using GCTA-COJO.<sup>19,20</sup> We next  
740 calculated the posterior probability of causality. To do so, we defined each conditionally-  
741 independent lead SNP as a signal around which, we would undertake posterior probability  
742 testing. We used all imputed SNPs within 500 kbp of a conditionally independent lead SNP and  
743 treated each signal independently. We used FINEMAP<sup>20</sup>, which approximates, per input region,  
744 genotype-phenotype data with correlation matrices and summary statistics, and then  
745 implements a shotgun stochastic search algorithm to test causal configurations of SNPs rapidly  
746 and identify the most likely number of causal SNPs per signal in a Bayesian framework. We  
747 generated correlation matrices for each fine-mapped region from a subset of randomly selected  
748 50,000 White-British UK Biobank participants with the LDSTORE software<sup>60</sup>. FINEMAP was run  
749 with default parameters except for the number of maximum causal configurations tested, which  
750 we set to 10.<sup>20</sup> For the causal configuration with the highest posterior probability, each SNP was  
751 assigned a  $\log_{10}$  Bayes factor as a measure of its posterior probability for being in the causal  
752 configuration. For example, if a tested region had a causal configuration of six SNPs with the  
753 highest posterior probability, all tested SNPs were assigned a Bayes factor for their marginal  
754 posterior probabilities of being in that causal configuration. Based on this information we  
755 constructed our sets of fine-mapped SNPs, including only the SNPs with the highest posterior  
756 probabilities. After testing each signal at a locus, the set of fine-mapped SNPs were collapsed  
757 into the same locus, due to the high amount of redundancy between credible sets for each  
758 signal, given that the approximation of genotype-phenotype data with correlation matrices and  
759 summary statistics implemented by FINEMAP is identical to GCTA-COJO.<sup>19,20</sup> We used a  $\log_{10}$   
760 Bayes factor > 3 threshold to only consider SNPs with the strongest posterior probabilities for  
761 causality, and those SNPs that were identified as genome-wide significant conditionally  
762 independent lead SNPs, as being fine-mapped SNPs.

763

## 764 **RNA sequencing for mouse osteocytes**

765 We performed an analysis of whole transcriptome sequencing data of three distinct bone types  
766 from the mouse skeleton to measure osteocyte expression<sup>4</sup>. The three sites were the tibia,  
767 femur and humerus, and in each, the bone marrow was removed (N = 8 per site). The  
768 distribution of normalized gene expression for each sample was used to calculate a threshold of  
769 gene expression<sup>61</sup>, with genes above this threshold for 8 out of 8 replicates in any bone type  
770 deemed to be expressed. Osteocyte enriched genes were determined by comparing the  
771 transcriptomes of matched bone sample controls, one with the marrow removed and the other  
772 with the marrow left intact (N = 5 per site). Genes significantly enriched in osteocytes and  
773 expressed in all bone types were defined as osteocyte transcriptome signature genes.  
774

## 775 **Assay for mapping accessible chromatin sites**

776 ATAC-seq libraries were generated by the McGill University and Genome Quebec Innovation  
777 Centre on 100,000 SaOS-2, U2OS, MG63 and HOS cells each, using a modified protocol to that  
778 previously described<sup>62</sup>. The modifications included: reducing the transposase reaction volume  
779 from 50  $\mu$ l to 25  $\mu$ l, increasing the transposase concentration from 1x to 40x, and using 12  
780 cycles of PCR to enrich each library. Libraries were quantified by Q-PCR, Picogreen and  
781 LabChip, then were sequenced on the Illumina HiSeq 2500 to 125 bp in pair-ended mode, using  
782 the Nextera sequencing primers. DNase-seq data from primary osteoblast samples<sup>21</sup> were  
783 obtained from <http://encodeproject.org> under accessions ENCLB776DWN and ENCLB906BCL.  
784 Illumina adapters were clipped off using Trimmomatic v. 0.36<sup>63</sup> and reads were aligned to the  
785 hg38 human reference using BWA v.0.7.15<sup>64</sup>. peaks were called hotspot2  
786 (<https://github.com/Altius/hotspot2>) using a cutoff of 1% FDR and converted to hg19 reference  
787 coordinates using UCSC liftOver.  
788

## 789 **RNA sequencing for human osteoblast cell lines**

790 RNA library preparations were carried out on 500 ng of RNA from SaOS-2, U2OS, MG63 and  
791 HOS cells with RNA integrity number (RIN) > 7 using the Illumina TruSeq Stranded Total RNA  
792 Sample preparation kit, according to manufacturer's protocol. Final libraries were analyzed on a  
793 Bioanalyzer and sequenced on the Illumina HiSeq4000 (pair-ended 100 bp sequences). Raw  
794 reads were trimmed for quality (phred33  $\geq$  30) and length (n  $\geq$  32), and Illumina adapters were  
795 clipped off using Trimmomatic v. 0.35<sup>63</sup>. Filtered reads were aligned to the GRCh37 human  
796 reference using STAR v. 2.5.1b<sup>65</sup>. Raw read counts of genes were obtained using HTseq-count  
797 v.0.6.1<sup>66</sup>.  
798

## 799 **RNA sequencing for murine calvarial osteoblasts**

800 We used whole transcriptome sequencing on mouse osteoblasts post-differentiation to obtain  
801 expression profiles of the maturing osteoblast<sup>4</sup>. We obtained pre-osteoblast-like cells from the  
802 neonatal calvaria of C57BL/6J mice carrying a Cyan Fluorescent Protein (CFP) transgene under  
803 the control of the *Col* 3.6 kbp promoter<sup>67</sup>. Specifically, we removed cells not expressing CFP by  
804 FACS sorting after culturing for four days in growth media. The remaining cell set was  
805 considered enriched for pre-osteoblast cells and was re-plated and subjected to an osteoblast  
806 differential cocktail, with RNA being collected every two days from days two to 18 post-  
807 differentiation. We used whole transcriptome sequencing with three technical replicates per  
808 sample and calculated a normalized expression level per gene.  
809

## 810 **High-throughput chromosome conformation capture**

811 High-throughput chromosome conformation capture (Hi-C) was performed on primary human  
812 osteoblasts and osteocytes from human bone biopsies of non-fracture subjects. Hi-C libraries  
813 were prepared as described previously.<sup>68</sup> Instead of using HindIII restriction enzyme, we used

814 DpnII<sup>69</sup> which increased coverage and insensitivity of CpG lamination<sup>70</sup>. The Hi-C libraries  
815 were sequenced on Illumina HiSeq4000 instruments to 2 billion pair-end reads. Biological  
816 replicates were independently generated and sequenced. HiC-Pro was used to process the  
817 HiC-Pro pipeline<sup>71</sup> beginning with aligning each read end to hg38 reference genomes. The  
818 Chimeric read ends were filtered to keep only 5' alignments with MAPQ > 10, and then read-  
819 ends were paired and de-duplicated. Contact matrices were constructed, and significant  
820 interactions were estimated with Homer,<sup>72</sup> GOTHIC<sup>73</sup> and Juicer.<sup>74</sup> We defined significant  
821 interactions as  $P < 10^{-15}$  (comparing observed interactions to estimated expected interactions  
822 and taking into account DNA fragment size, GC content, and other genomic features). Only  
823 interaction pairs that were significant ( $P < 10^{-15}$ ) from all three tools were considered significant.  
824 The resolution of Hi-C interactions was from 1.5 to 2 kbp with average 1.8 kbp.

### 825 **STARLinG: Target Gene identification**

827 We identified Target Genes for the autosomal fine-mapped sets by annotating fine-mapped sets  
828 of SNPs to the closest protein-coding gene, making additional note if the SNP mapped directly  
829 to the gene's introns or exons, or was coding. We identified Target Genes on the X  
830 chromosome by the closest gene to a conditionally independent lead SNP, as we did not  
831 calculate  $\log_{10}$  Bayes factors for SNPs on the X chromosome. Additionally, we annotated Target  
832 Genes that may be functional in bone cells by marking which fine-mapped SNPs mapped to  
833 open chromatin in human bone cells, identified by SaOS-2 ATAC-seq peaks, and we mapped  
834 chromosomal positions of fine-mapped SNPs to significant Hi-C interactions of primary  
835 osteoblast and osteocytes. When the interaction chromatin mapped to multiple isoforms of  
836 protein coding genes, we selected the one with the most significant interaction (usually with  
837 highest interaction counts). When the interaction chromatin mapped to multiple bins, we  
838 selected the one(s) with looping domains. We further annotated Target Genes using the  
839 osteocyte signature gene set where genes within this set are enriched for osteocyte activity.<sup>4</sup>

### 840 **STARLinG: Target Gene enrichment analyses**

842 We performed a series of enrichment analyses by calculating the odds of Target Genes being  
843 either positive control genes or osteocyte signature genes. We identified a set of 57 proteins  
844 whose perturbation through pharmacotherapy,<sup>2</sup> or Mendelian disease leads to changes in bone  
845 density, monogenic disorders presenting with abnormal skeletal mineralization or low bone  
846 mass, osteolysis and/or skeletal fragility and osteogenesis imperfecta and abnormal skeletal  
847 mineralization (**Table S12**).<sup>22</sup> For all protein-coding genes in the genome, which were identified  
848 using refGene (N = 19,455), we annotated whether they were found to be Target Genes and/or  
849 positive control genes. These annotations allowed us to construct contingency tables and  
850 calculate an odds ratio for enrichment of Target Genes amongst positive control genes. We  
851 used multiple genomic features to test which methods of identifying Target Genes enriched for  
852 positive control genes. To do so, we tested if positive control genes were enriched amongst  
853 targeted genes identified by four different methods: 1) Genes that were most proximal to the  
854 fine-mapped set SNPs; 2) Genes that contained fine-mapped SNPs overlapping their gene  
855 bodies; 3) Genes containing fine-mapped SNPs that are coding variants; 4) Genes identified to  
856 be in 3D contact with fine-mapped sets in human osteoblasts or osteocytes through Hi-C  
857 experiments; 5) The closest gene to fine-mapped SNPs, which also mapped to ATAC-seq  
858 peaks in human osteoblast SaOS-2 cell lines; and 6) Those genes within 100 kbp of fine-  
859 mapped SNPs (**Figures 2 and 4**). We then repeated this analysis using the osteocyte signature  
860 gene set (N = 1,240) instead of the positive control set, to calculate the odds of Target Genes  
861 being active in the osteocyte.

### 862 **Target Gene pathway analysis**

864 We used the Functional Mapping and Annotation of GWAS tool (FUMA)<sup>23</sup> to annotate our lists  
865 of Target Genes for their most enriched biological pathways with data from the WikiPathways<sup>24</sup>  
866 database. WikiPathways is an openly curated database for biological pathways and provides  
867 information on the roles of specific genes or proteins in their respective pathways. FUMA uses  
868 WikiPathways data to compare a list of given genes against a background gene set (e.g. all  
869 protein coding genes) with hypergeometric testing. The output is then a list of enriched  
870 biological pathways based on the input gene lists. We have presented these data graphically in  
871 the [Figure S7](#).

872

### 873 **CRISPR/Cas9 Methods**

874 SaOS-2 cells were obtained from ATCC (#ATCC HTB-85) and cultured in McCoy5A medium  
875 (ATCC) supplemented with 15% of FBS (Wisent inc) and 1% of penicillin and streptomycin  
876 (Wisent Inc.) according to the manufacturer. Three different guide RNAs (gRNA) targeting the  
877 second exon of *DAAM2* were cloned in the PX458 plasmid (pSpCas9(BB)-2A-GFP; Addgene  
878 #48138). The gRNA sequences were: gRNA 1-CAGAGGGTGGTTGTCCCGG; gRNA 2-  
879 CAGCCCCATCCCGAACGCAG; and gRNA 3-TGTCCCGGAGGTTGATTTTCG. We observed  
880 the cutting frequency determination (CFD) scores<sup>75</sup> for each gRNA was < 0.1, therefore we did  
881 not consider off-target effects to merit testing<sup>76</sup>. The construct plasmids were purified using the  
882 QIAGEN filter midi prep kit (QIAGEN #12243) according to manufacturer instructions. SaOS-2  
883 cells were cultured to 80% confluence in a 100-mm<sup>2</sup> petri dish. Cells were then transfected with  
884 one of the three different plasmids generated, or with the intact plasmid as a control, using  
885 TransIT LT1 transfection reagent (Mirus #MIR2304) with a reagent-to-DNA ratio of 3:1. 48 hours  
886 post-transfection, GFP positive cells were sorted by FACS in a single cell model. The remaining  
887 colonies were expanded and then assessed for the presence of *DAAM2* protein using  
888 immunofluorescence technique (Anti-*DAAM2* antibody, Sigma-Aldrich #HPA051300). PCR  
889 primers were designed against regions of *DAAM2* flanking the three gRNA target sequences  
890 (forward: 5'-tcctctgtccagATCACAAATG-3' and reverse: 5'-ccaagaggagtttgagagatgga-3') to  
891 generate an amplicon of 355 bp. PCR products of the identified clones were sequenced using  
892 MiSeq (Genome Quebec).

893

894 To generate *DAAM2* Western blots ([Figure S23](#)), total protein was extracted from SaOS-2 cells  
895 using a RIPA buffer. Denatured proteins (20 µg) were separated by 10% sodium dodecylsulfate  
896 (SDS) polyacrylamide gel electrophoresis followed by transfer to nitrocellulose membranes. The  
897 membranes were blocked in 5% skim milk for one hour at room temperature followed by  
898 incubation with an anti-*DAAM2* antibody (Abcam #ab169527) at 1/1,000 overnight at 4°C and  
899 the secondary antibody goat anti-rabbit IgG at 1/10,000 for one hour at room temperature  
900 (Abcam #ab205718). The band densities were quantified by densitometry using Image Lab 5.1  
901 software (Bio-Rad). Protein levels were expressed as a ratio of protein-specific band density  
902 and that of total protein stained using MemCode Staining Solution (ThermoFisher #24580).  
903 [Figure S23](#) shows that *DAAM2* protein expression was reduced to 17.5% and 33.5% in the  
904 gRNA1 and gRNA2 edited clones, respectively.

905

906 To induce mineralization ([Figure 5](#)), cells were then cultured to 90% confluence in a 6-well plate  
907 and then treated, or left untreated for a control, with osteogenic factors (Ascorbic acid 50 µg/ml  
908 and β-Glycerophosphate 10 mM). Fresh media containing osteogenic factors was added every  
909 2-3 days over 13 days. At day 14, mineralization was quantified using the osteogenesis assay  
910 kit according to manufacturer instructions (Millipore #ECM815). The Alizarin red concentration  
911 (µM) was normalized with the protein content assessed in the media in each culture (Pierce  
912 BCA Protein assay kit; Thermo Fisher #23227).

913

### 914 **Rapid throughput murine knockout program**

915 The Origins of Bone and Cartilage Disease (OBCD) program ([www.boneandcartilage.com](http://www.boneandcartilage.com)) is  
916 undertaking rapid-throughput structural and functional skeletal phenotype analyses of all  
917 unselected knockout mice generated at the Wellcome Trust Sanger Institute as part of the  
918 International Knockout Mouse and International Mouse Phenotyping Consortia (IKMC and  
919 IMPC). Anonymized samples from 16-week-old female wild-type and mutant mice (N = 2 to 6  
920 per mutant genotype) were stored in 70% ethanol and assigned to batches for rapid throughput  
921 analysis. Mice were fed either a Breeder's Chow (Mouse Breeder Diet 5021, 21% kcal as fat,  
922 Labdiet, London, UK) or a Western diet (Western RD, 829100, 42% kcal as fat, Special Diet  
923 Services, Witham, UK) from 4 weeks of age. The relative bone mineral content and length of the  
924 femur and caudal vertebrae are determined by digital X-ray microradiography (Faxitron MX20,  
925 10µm pixel resolution)<sup>77-79</sup>. Micro-CT (Scanco uCT50, 70kV, 200µA, 0.5mm aluminium filter) is  
926 used to determine trabecular parameters (bone volume BV/TV, trabecular number Tb.N,  
927 thickness Tb.Th, spacing Tb.Sp) at a 5µm voxel resolution in a 1mm region beginning 100µm  
928 proximal to the distal femoral growth plate and cortical bone parameters (thickness Ct.Th, BMD,  
929 medullary diameter) at a 10µm voxel resolution in a 1.5mm region centered in the mid-shaft  
930 region 56% along the length of the femur distal to the femoral head.<sup>77,80,81</sup> Biomechanical  
931 variables of bone strength and toughness (yield load, maximum load, fracture load, % energy  
932 dissipated prior to fracture) are derived from destructive 3-point bend testing of the femur and  
933 compression testing of caudal vertebra 6 and 7 (Instron 5543 load frame, 100N and 500N load  
934 cells).<sup>77,79</sup> Overall, 19 skeletal parameters were reported for each individual mouse studied and  
935 compared to reference data obtained from 320 16-week-old wild-type C57BL/6 female mice.  
936 Outlier phenotypes were defined by parameters > 2 standard deviations away from the  
937 reference mean determined from the 320 age, sex and genetically identical C57BL/6N wild-type  
938 controls. Enrichment of outlier skeletal parameters in mice with deletion of eBMD Target Genes  
939 was determined by comparison with the frequency of outlier parameters in 526 unselected  
940 knockout lines using Fisher's Exact Test (Table S18, Prism, GraphPad Software, La Jolla,  
941 USA). The 526 unselected knockout lines were generated by the WTSI and phenotyped by the  
942 OBCD program; these lines included 56 Target Genes. Five Target Genes had previously been  
943 phenotyped in an OBCD pilot study<sup>77</sup> and knockout lines for an additional 65 Target Genes, that  
944 had already been generated by WTSI, were prioritized for rapid-throughput skeletal  
945 phenotyping. In total, our analyses included 596 knockout lines.

946  
947 Additional skeletal samples from 16-week-old WT (n=5 female, n=5 male), *Daam2*<sup>+/*tm1a*</sup> (n=7  
948 female, n=5 male) and *Daam2*<sup>*tm1a/tm1a*</sup> (n=7 female, n=5 male) mice were analyzed as described  
949 above. Supplementary cortical bone parameters (total cross-sectional area Tt.Ar, cortical bone  
950 area Ct.Ar, medullary area M.Ar, periosteal perimeter Ps.Pm, endocortical perimeter Ec.Pm,  
951 cortical porosity Ct.Po, polar moment of inertia (J) and maximum and minimum moments of  
952 inertia (*I*<sub>max</sub> and *I*<sub>min</sub>)) were determined by micro-CT (at 10µm voxel resolution, except for  
953 Ct.Po which was determined at 1µm voxel resolution using the Scanco uCT50 at 70kV, 57µA,  
954 0.5mm aluminium filter). Correlation between bone mineral content and biomechanical  
955 parameters was determined by linear regression analysis using 320 16-week-old WT femur and  
956 vertebra samples from C57BL/6 female mice. Bone quality was investigated in *Daam2*<sup>*tm1a/tm1a*</sup>  
957 mice by comparing observed biomechanical parameters with values predicted by linear  
958 regression analysis of femoral and vertebral BMC and biomechanical parameters obtained from  
959 320 WT age and sex matched controls.

#### 960 ***Daam2* knockout mice**

962 Mouse studies undertaken at the Garvan Institute of Medical Research (Darlinghurst, NSW,  
963 Australia) were approved by the Garvan Institute / St Vincent's Hospital Animal Ethics  
964 Committee in accordance with New South Wales (Australia) State Government legislation.  
965 *Daam2*<sup>*tm1a(KOMP)Wtsi*</sup> mice (designated *Daam2*<sup>*tm1a/tm1a*</sup>) were obtained from the Wellcome

966 Trust/Sanger Institute (Cambridge, UK) where the mice were generated as part of the  
967 International Mouse Phenotyping Consortium (<http://www.sanger.ac.uk/mouseportal>), using ES  
968 cells produced by the Knockout Mouse Project  
969 (<https://www.komp.org/geneinfo.php?Symbol=Daam2>). The *Daam2* gene in these mice was  
970 disrupted by a cassette containing an insertion with an additional splice acceptor site between  
971 exons 5 and 6  
972 (<http://www.mousephenotype.org/data/alleles/MGI:1923691/tm1a%28KOMP%29Wtsi?>). The  
973 success of this strategy was confirmed with an 80% knockdown of *Daam2* in *Daam2*<sup>tm1a/tm1a</sup> and  
974 50% knockdown in *Daam2*<sup>+tm1a</sup>. Age and sex matched 16-week old mice were used for detailed  
975 skeletal phenotyping, as described above.

976

#### 977 **In vitro assays of osteoclast formation**

978 Osteoclasts were generated from primary BMCs flushed from mouse long bones of 8-10 week  
979 old WT, *Daam2*<sup>+tm1a</sup> and *Daam2*<sup>tm1a/tm1a</sup> mice, resuspended in MEM/FBS then added (10<sup>5</sup>  
980 cells/well) to 6mm diameter culture wells. These were stimulated with 10, 20, 50 and 100 ng/ml  
981 RANKL, plus 50 ng/mL M-CSF. Medium and cytokines were replaced at day 3, and on day 6  
982 cultures were fixed with 4% paraformaldehyde and histochemically stained for TRAP using as  
983 previously described.<sup>82</sup> TRAP positive multinucleated cells (MNCs) containing 3 or more nuclei  
984 were counted as osteoclasts and quantified under inverted light microscopy.

985

#### 986 **In vitro osteoblast mineralization**

987 Plastic-adherent bone marrow stromal cells (BMSCs) were isolated from 8-10 week old WT,  
988 *Daam2*<sup>+tm1a</sup> and *Daam2*<sup>tm1a/tm1a</sup> mice as described previously.<sup>83</sup> Briefly, marrow cells were  
989 flushed from mouse long bones and plated in MEM containing 20% FBS in 25cm<sup>2</sup> tissue culture  
990 flask. Non-adherent cells were removed by medium changes 3 and 5 days later. After 7 days in  
991 culture, cells were trypsinized, scraped and re-plated at 3 x 10<sup>4</sup> cells/cm<sup>2</sup> in 24-well plates in  
992 MEM with 10% FBS containing osteoblast differentiating factors (50 µg/ml ascorbic acid, 2.5nM  
993 dexamethasone and 10 mM β-glycerolphosphate; Sigma-Aldrich), which was added and  
994 changed every 3 days for 21 days. Cells were washed with PBS and fixed with 4%  
995 paraformaldehyde for 15 mins then ethanol (80%) for 30 mins, rinsed and stained with 0.5%  
996 Alizarin Red (Sigma Aldrich) in water for 30 mins, washed, dried and images of the plates taken  
997 with a flat-bed scanner (model v800, Epson, North Ryde, NSW Australia). Alizarin red was then  
998 eluted with 10% cetyl pyridinium chloride (CTP; Sigma-Aldrich) in PBS overnight and quantified  
999 by measuring 562 nm absorbance (Clariostar plate reader, BMG Labtech, Offenburg, Germany)  
1000 relative to standard alizarin red solutions.

1001

#### 1002 **Detection of serum markers of bone resorption and formation**

1003 Serum levels of bone resorption marker tartrate-resistant acid phosphatase (TRAP) and bone  
1004 formation marker procollagen type 1 N-terminal propeptide (P1NP) were measured using a  
1005 Rat/Mouse TRAP enzyme immunoassay kit and a Rat/Mouse P1NP enzyme immunoassay kit  
1006 (Immunodiagnostic Systems, Gaithersburg, MD, USA) respectively.

1007

#### 1008 **Fourier-Transform Infrared Spectroscopy**

1009 The humeri from *Daam2* WT, *Daam2*<sup>+tm1a</sup> and *Daam2*<sup>tm1a/tm1a</sup> male and female mice were  
1010 collected at 16 weeks of age. 21 male samples (11 WT, 4 *Daam2*<sup>+tm1a</sup> and 6 *Daam2*<sup>tm1a/tm1a</sup>) and  
1011 19 female samples (8 WT, 5 *Daam2*<sup>+tm1a</sup> and 6 *Daam2*<sup>tm1a/tm1a</sup>) were examined. The bones were  
1012 frozen immediately and were kept at a stable temperature until analysis. All bones were  
1013 processed at the same time and all analyzed on the same day to reduce batch effects. The  
1014 humeri were thawed, stripped of soft tissue with epiphyses removed and the marrow cavity was  
1015 flushed. Specimens were then refrozen in liquid nitrogen and pulverized at -80°C using a SPEX  
1016 Sample Prep 6870 Freezer/Mill. Each sample was subjected to three rounds of pulverization at

1017 15 cycles per second for one minute with a two-minute cool-down between each round. The  
1018 samples were lyophilized under vacuum at -51°C overnight to ensure they were completely  
1019 dehydrated. Anhydrous potassium bromide (KBr) was then added until the final concentration of  
1020 bone in the samples was between 2.50-2.56% by mass. KBr pellets were formed by  
1021 compressing 20 mg of mixed KBr and bone samples in a 7 mm die under 4 tons of force. The  
1022 formed pellets were loaded into a Nicolet iS50 FT-IR spectrophotometer (Thermo Fisher  
1023 Scientific). The collection chamber was continuously purged with dry nitrogen gas to minimize  
1024 noise from moisture and carbon dioxide. Background noise was collected on KBr-only pellets  
1025 and subtracted at the beginning of each cohort or after 30min of continuous measurements  
1026 (whichever occurred first). For each sample, 128 scans between 400-2200  $\text{cm}^{-1}$  (wave numbers)  
1027 were collected at a resolution of 4.0 $\text{cm}^{-1}$  using Happ-Genzel apodization. The wave number  
1028 data was curve fit to absorbance, with baselining and spectral analyses performed using custom  
1029 algorithms and scripts written in the R programming language (R version 3.4.2). The scripts  
1030 were built on top of the ChemoSpec (version 4.2.8) and MESS (version 0.3-2) packages. Local  
1031 minima were used as limits of integration to calculate areas under the curve for the carbonate,  
1032 phosphate and amide I peaks; the mineral to matrix ratio, carbonate to phosphate ratio were  
1033 then calculated using these areas in the appropriate ratios. Collagen maturity and crystallinity  
1034 were calculated from the spectral data using absorbance values at literature-reported and  
1035 validated wavenumbers.<sup>84</sup> Between two and four technical replicates were run for each sample,  
1036 based on the amount of material available. Two samples (both from WT males) were removed  
1037 from all subsequent statistical analyses as the signal to noise ratio was excessive for the  
1038 spectral data for all technical replicates, thus precluding obtaining meaningful information from  
1039 those samples. Values for technical replicates were averaged for each specimen. Differences  
1040 between genotypes were determined by ANOVA, followed by a Tukey's post hoc test. Data from  
1041 male and female mice were analyzed separately.

#### 1042 **URLs**

1043 URLs to download the genome-wide association summary statistics for eBMD and fracture, as  
1044 well as RNA-seq and ATAC-seq data generated for the SaOS-2, U2OS, MG63 and HOS human  
1045 osteoblast cell lines, will be made available after peer-reviewed publication.  
1046

## 1047 **Figure Legends**

### 1048 **Figure 1. Manhattan plot of genome-wide association results for eBMD in the UK**

1049 **Biobank.** The dashed red line denotes the threshold for declaring genome-wide significance  
1050 ( $6.6 \times 10^{-9}$ ). 1,103 conditionally independent SNPs at 515 loci passed the criteria for genome-  
1051 wide significance. 301 novel loci (defined as > 1 Mbp from previously reported genome-wide  
1052 significant BMD variants) reaching genome-wide significance are displayed in blue. Previously  
1053 reported loci that reached genome-wide significance are displayed in red, and previously  
1054 reported loci failing to reach genome-wide significance in our study are shown in black.

1056 **Figure 2. Fine-mapping SNPs and target gene selection diagram. A)** For each 500 Mbp  
1057 region around a conditionally independent lead SNP, we applied statistical fine-mapping to  
1058 calculate  $\log_{10}$  Bayes factors for each SNP as a measure of their posterior probability for  
1059 causality. SNPs that were conditionally independent lead SNPs or that had  $\log_{10}$  Bayes factors >  
1060 3 were considered our fine-mapped SNPs that we then used for target gene identification. **B)**  
1061 Target Genes were identified if: 1) It was the gene closest to a fine-mapped SNP. 2) A fine-  
1062 mapped SNP was in its gene body. 3) A fine-mapped SNP was coding. 4) The gene mapped  
1063 closest to a fine-mapped SNP which resided in an SaOS-2 ATAC-seq peak. 5) A fine-mapped  
1064 SNP was present in a Hi-C osteoblast or osteocyte promoter interaction peak, therefore being  
1065 closer to a target gene in three-dimensions than linearly on the genome.

1067 **Figure 3. SNPs at genome-wide significant loci are enriched for osteoblast**  
1068 **open chromatin sites. A)** Odds ratio for missense, osteoblast DHSs and SaOS-2 ATAC-seq  
1069 peaks for SNPs that are conditionally independent or achieving a  $\log_{10}$  Bayes factor > 3. Note  
1070 the  $\log_{10}$  Bayes factor > 3 set contains nearly twice the number of SNPs. **B)** Ranking SNPs by  
1071  $\log_{10}$  Bayes factor (x-axis) shows increasing enrichment of missense SNPs and of SNPs at  
1072 accessible chromatin sites.

### 1074 **Figure 4. STARLinG Workflow.**

1076 **Figure 5. Reduction in DAAM2 protein resulted in decreased mineralization in SaOS-2**  
1077 **cells.** Mineralization quantification in control cells and *DAAM2* exon 2 double-stranded break  
1078 (DSB) induced cells in either the presence of osteogenic factors (treated) or absence  
1079 (untreated). Bars in (a) represent the mean of six independent experiments  $\pm$  SEM from Alizarin  
1080 red staining in (b) to quantify mineralization. \*\*\*  $P < 0.001$  compared to untreated control cells  
1081 and &&&  $P < 0.001$  compared to treated control cells determined by one-way Anova and a  
1082 Bonferroni post-hoc test.

1084 **Figure 6. Biomechanical Analyses of mice with *Daam2* knockdown. A) Femur**  
1085 **biomechanical analysis.** Destructive 3-point bend testing (Instron 5543 load frame) of femurs  
1086 from WT ( $N_{\text{Female}} = 3$ ,  $N_{\text{Male}} = 4$ ), *Daam2*<sup>+/*tm1a*</sup> ( $N_{\text{Female}} = 6$ ,  $N_{\text{Male}} = 4$ ), *Daam2*<sup>*tm1a/tm1a*</sup> ( $N_{\text{Female}} = 5$ ,  
1087  $N_{\text{Male}} = 9$ ) mice. Graphs showing yield load, maximum load, fracture load, stiffness (gradient of  
1088 the linear elastic phase) and toughness (energy dissipated prior to fracture). Data are shown as  
1089 mean  $\pm$  SEM; ANOVA and Tukey's post hoc test; (i) *Daam2*<sup>+/*tm1a*</sup> vs WT and *Daam2*<sup>*tm1a/tm1a*</sup> vs  
1090 WT, \*\* $P < 0.01$ ; \*\*\* $P < 0.001$  and (ii) *Daam2*<sup>+/*tm1a*</sup> vs *Daam2*<sup>*tm1a/tm1a*</sup>, # $P < 0.05$ ; ## $P < 0.01$ ; ### $P < 0.001$ .  
1091 **B) Vertebra biomechanical analyses.** Destructive compression testing (Instron 5543 load  
1092 frame) of caudal vertebrae from WT ( $N_{\text{Female}} = 3$ ,  $N_{\text{Male}} = 4$ ), *Daam2*<sup>+/*tm1a*</sup> ( $N_{\text{Female}} = 6$ ,  $N_{\text{Male}} = 4$ ),  
1093 *Daam2*<sup>*tm1a/tm1a*</sup> ( $N_{\text{Female}} = 5$ ,  $N_{\text{Male}} = 9$ ) mice. Graphs showing yield load, maximum load, and  
1094 stiffness. Data are shown as mean  $\pm$  SEM; ANOVA and Tukey's post hoc test; (i) *Daam2*<sup>*tm1a/tm1a*</sup>  
1095 vs WT, \* $P < 0.05$  and \*\* $P < 0.01$  and (ii) *Daam2*<sup>+/*tm1a*</sup> vs *Daam2*<sup>*tm1a/tm1a*</sup>, # $P < 0.05$ . Females are on  
1096 left and males on right. **C) Bone quality analysis from rapid throughput screening murine**  
1097 **knockouts.** The graph demonstrates the physiological relationship between bone mineral



1098 content and stiffness in caudal vertebrae from P112 female WT mice (N = 320). The blue line  
1099 shows the linear regression ( $P = 0.0001$ ) and the grey box indicates  $\pm 2SD$ . The mean value for  
1100 female *Daam2*<sup>tm1a/tm1a</sup> (N = 2 from initial OBCD screen) mice is shown in orange (-2.14 SD).

1101

1102 **Figure S1. Flow diagram illustrating calcaneal quantitative ultrasound (QUS) data**

1103 **collection by the UK Biobank.** QUS data were collected at three time points: Baseline (2007 -  
1104 2010), Follow-up 1 (2012 - 2013) and Follow-up 2 (2014 - 2016). At baseline, QUS was  
1105 performed using two protocols (denoted protocol 1 and 2). Protocol 1 was implemented from  
1106 2007 to mid-2009 and involved measuring the left calcaneus. Only in cases where the left was  
1107 missing or deemed unsuitable was the right calcaneus measured. Protocol 2 was introduced  
1108 from mid-2009, (replacing protocol 1) and differed only in that it involved measuring both the left  
1109 and right calcanei. Protocol 2 was further used for both follow up assessments. For all three  
1110 time points, calcaneal QUS was performed with the Sahara Clinical Bone Sonometer [Hologic  
1111 Corporation (Bedford, Massachusetts, USA)]. Vox software was used to automatically collect  
1112 data from the sonometer (denoted direct input). In cases where direct input failed, QUS  
1113 outcomes were manually keyed into Vox by the attending healthcare technician or nurse (i.e.  
1114 manual input). The number of individuals with non-missing measures for speed of sound (SOS)  
1115 and broadband ultrasound attenuation (BUA) recorded at each assessment period are indicated  
1116 in light grey. Further details on these methods are publicly available on the UK Biobank website  
1117 (UK Biobank document #100248

1118 <https://biobank.ctsu.ox.ac.uk/crystal/docs/Ultrasoundbonedensitometry.pdf>). To reduce the  
1119 impact of outlying measurements, Individuals with highly discordant left vs. right calcaneal  
1120 measures were excluded from the analysis. Furthermore, quality control was applied to male  
1121 and female subjects separately using the following exclusion thresholds: SOS [Male: ( $\leq 1,450$   
1122 and  $\geq 1,750$  m/s), Female ( $\leq 1,455$  and  $\geq 1,700$  m/s)] and BUA [Male: ( $\leq 27$  and  $\geq 138$  dB/MHz),  
1123 Female ( $\leq 22$  and  $\geq 138$  dB/MHz)]. Individuals exceeding the threshold for SOS or BUA or both  
1124 were removed from the analysis. Estimated bone mineral density [eBMD, (g/cm<sup>2</sup>)] was derived  
1125 as a linear combination of SOS and BUA (i.e.  $eBMD = 0.002592 * (BUA + SOS) - 3.687$ ).  
1126 Individuals exceeding the following thresholds for eBMD were further excluded: [Male: ( $\leq 0.18$   
1127 and  $\geq 1.06$  g/cm<sup>2</sup>), Female ( $\leq 0.12$  and  $\geq 1.025$  g/cm<sup>2</sup>)]. The number of individuals with non-  
1128 missing measures for SOS, BUA and eBMD after QC are indicated in black. A unique list of  
1129 individuals with a valid measure for the left calcaneus (N=477,380) and/or right (N=181,953)  
1130 were identified separately across all three time points. Individuals with a valid right calcaneus  
1131 measure were included in the final data set when no left measures were available, giving a  
1132 preliminary working dataset of N=481,100, (left=475,724 and right=5,376) unique individuals.  
1133 Bivariate scatter plots of eBMD, BUA and SOS were visually inspected and 723 additional  
1134 outliers were removed, leaving a total of 480,377 valid QUS measures for SOS, BUA and BMD  
1135 (264,304 females and 216,073 males).

1136

1137 **Figure S2. QQ plot of GWAS for eBMD.** Results are from the entire genome and not  
1138 conditionally independent SNPs.

1139

1140 **Figure S3. Relationship between absolute effect size (y-axis) and minor allele frequency**

1141 **(x-axis) for 1,103 conditionally independent SNPs.** Red dots represent SNPs at previously  
1142 reported BMD loci. Blue dots represent SNPs at novel loci. The named gene is that closest to  
1143 the SNP that has the smallest P-value of all conditionally independent SNPs present in the  
1144 same locus. We emphasize that proximity is not necessarily indicative of causality.

1145

1146 **Figure S4. Effect size in standard deviations for eBMD (y-axis) from the current UK**  
1147 **Biobank Study plotted against effect size in standard deviations from the previous**  
1148 **GEFOS studies for BMD at the (A) femoral neck, (B) lumbar spine, (C) forearm, (D) total-**

1149 **body, (E) heel and (F) fracture as per the full UK Biobank cohort (x-axis).** Only conditionally  
1150 independent variants that reach genome-wide significance ( $P < 6.6 \times 10^{-9}$ ) for eBMD in the UK  
1151 Biobank are plotted. Minus  $\log_{10}$  P-value for the fracture analysis in UK Biobank is represented  
1152 by the shading of the data points (black for robust evidence of association with fracture and  
1153 white for poor evidence of association). The blue dashed trend line shows a moderate to strong  
1154 correlation between estimated effect sizes at the heel and femoral neck [ $r=0.53$  95%-CI  
1155 (0.49,0.57)], lumbar spine [0.59 (0.55,0.63)], forearm [0.46 (0.41, 0.50)], total-body [0.70  
1156 (0.67,0.73)], interim heel [0.93 (0.92,0.94)] and fracture [-0.77 (-0.79, -0.74)]. SNPs that reach  
1157 genome-wide significance for fracture look-up ( $P < 6.6 \times 10^{-9}$ ) are labelled in black.

1158  
1159 **Figure S5. Manhattan plot of genome-wide association results for fracture in the UK**  
1160 **Biobank.** Manhattan plot showing genome-wide association results for fracture in the UK  
1161 Biobank. The dashed red line denotes the threshold for declaring genome-wide significance  
1162 ( $6.6 \times 10^{-9}$ ). In total, 14 conditionally independent SNPs at 13 loci passed the criteria for genome-  
1163 wide significance. Blue dots represent a locus identified from the eBMD GWAS that was novel  
1164 in this analysis. Red dots represent a locus associated with eBMD which was known from  
1165 previous studies. Previously reported BMD loci failing to reach genome-wide significance in our  
1166 study are shown in black.

1167  
1168 **Figure S6. Analysis of sex heterogeneity for eBMD.** The top-most figure is a Miami plot of  
1169 genome-wide association results for females (top panel) and males (bottom panel). The bottom  
1170 graph is a Manhattan plot for the test for sex heterogeneity in eBMD regression coefficients  
1171 between males and females. Previously reported loci that reached genome-wide significance ( $P$   
1172  $< 6.6 \times 10^{-9}$ ) are displayed in red, and previously reported loci failing to reach genome-wide  
1173 significance in our study are shown in black. Loci containing *ABO*, *FKBP4*, *LOC105370177* and  
1174 *FAM9B* had stronger effects on eBMD in males, whereas *MCM8* had a larger effect in females.  
1175 Loci demonstrating significant heterogeneity ( $P < 6.6 \times 10^{-9}$ ) but were not robustly associated at  
1176 genome-wide significance with eBMD in the males and/or females are in green (i.e. *MCCD1* and  
1177 *ZNF398*).

1178  
1179 **Figure S7.** WikiPathways pathway analysis results from FUMA for (A) genes closest to a fine-  
1180 mapped SNP, (B) genes with fine-mapped SNPs mapping to its gene body, (C) genes with  
1181 coding fine-mapped SNPs, (D) genes mapped closest to a fine-mapped SNP which resided in  
1182 an SaOS-2 ATAC-seq peak, and genes identified by fine-mapped SNP was present in a (E) Hi-  
1183 C osteoblast or (F) osteocyte promoter interaction peak. Well known pathways for bone biology  
1184 were highlighted by FUMA, such as Wnt signalling, endochondral ossification, osteoclast and  
1185 osteoblast signalling.

1186  
1187 **Figure S8. Expression of *DAAM2* in osteoblast cell lines from RNA Sequencing**  
1188 **experiments and open chromatin profiles from ATAC-seq experiments.** Blue shows  
1189 forward strand expression, while red shows reverse strand expression. Dark purple shows  
1190 ATAC-seq open chromatin peaks. RNA of *DAAM2* is present in all cell lines, but particularly,  
1191 SaOS-2, HOS and U-2\_OS cell lines.

1192  
1193 **Figure S9: No unspecific labeling of the secondary antibody in the SaOS-2 osteoblast cell**  
1194 **line.** Representative immunofluorescence of SaOS-2 cell lines stained with goat anti-rabbit IgG  
1195 Alexa Fluor 488 secondary antibody (Abcam, ab150077; 1/1000), counterstained with DAPI  
1196 (blue) and observed by confocal microscopy.

1197  
1198 **Figure S10. *DAAM2* is localized to the nucleus of SaOS-2 osteoblast cell lines.**  
1199 Representative immunofluorescence of SaOS-2 cell lines stained with anti-*DAAM2* antibody

1200 (Sigma Aldrich, HPA051300; 1/200) followed by goat anti-rabbit IgG Alexa Fluor 488 secondary  
1201 antibody (Abcam, ab150077; 1/1000), counterstained with DAPI (blue) and observed by  
1202 confocal microscopy.

1203  
1204 **Figure S11. Additional skeletal phenotyping of *Daam2* knockdown at postnatal day 112.**  
1205 **A) Bone mineral content and length.** X-ray microradiography images (Faxitron MX20)  
1206 showing femur and caudal vertebrae from female (left) and male (right) wild-type (WT; female  
1207 n=5, male=5), heterozygous (*Daam2*<sup>+/*tm1a*</sup> female n=7, male n=5) and homozygous  
1208 (*Daam2*<sup>*tm1a/tm1a*</sup>; female n=7, male n= 9) knockout mice. Gray scale images of femur and caudal  
1209 vertebrae are pseudocoloured according to a 16-colour palette in which low mineral content is  
1210 green and high mineral content is pink. Relative frequency plots showing bone mineral content  
1211 in femur and caudal vertebrae from WT, *Daam2*<sup>+/*tm1a*</sup> and *Daam2*<sup>*tm1a/tm1a*</sup> mice; Kolmogorov–  
1212 Smirnov test, \**P*<0.05. Graphs demonstrate femur and caudal vertebra length in WT,  
1213 *Daam2*<sup>+/*tm1a*</sup> and *Daam2*<sup>*tm1a/tm1a*</sup> mice. Data are shown as mean ± SEM; ANOVA and Tukey's  
1214 post hoc test; \**P*<0.05; \*\**P*<0.01. **B) Trabecular bone parameters.** Micro-CT images (Scanco  
1215 MicroCT-50) showing proximal femur trabecular bone from WT, *Daam2*<sup>+/*tm1a*</sup>, *Daam2*<sup>*tm1a/tm1a*</sup>  
1216 mice. Graphs showing trabecular bone volume/tissue volume (BV/TV), trabecular number  
1217 (Tb.N), trabecular thickness (Tb.Th) and trabecular spacing (Tb.Sp). Data are shown as mean ±  
1218 SEM. **C) Cortical bone parameters.** Micro-CT images of mid-diaphysis cortical bone from WT,  
1219 *Daam2*<sup>+/*tm1a*</sup>, *Daam2*<sup>*tm1a/tm1a*</sup> mice. Graphs showing total cross-sectional area inside the  
1220 periosteal envelope (Tt.Ar), cortical bone area (Ct.Ar), cortical area fraction (Ct.Ar/Tt.Ar),  
1221 medullary (marrow cavity) area (M.Ar), periosteal perimeter (Ps.Pm), endocortical perimeter  
1222 (Ec.Pm), cortical thickness (Ct.Th), cortical bone mineral density (BMD), cortical porosity  
1223 (Ct.Po), polar moment of inertia (*J*), maximum moment of inertia (*I*<sub>max</sub>) and minimum moment  
1224 of inertia (*I*<sub>min</sub>). Data are shown as mean ± SEM.

1225  
1226 **Figure S12: Bone resorption and formation are not affected by *Daam2* knockdown.** **A)** No  
1227 difference in the number of bone marrow-derived TRAP+ multinucleated cells was observed  
1228 between WT and *Daam2*<sup>*tm1a/tm1a*</sup> male mice (Scale bar = 100 μM; n = 4; mean ± SEM). **B)** No  
1229 difference was observed in the mineralization of bone marrow stromal cells between WT and  
1230 *Daam2*<sup>*tm1a/tm1a*</sup> mice. No difference in bone resorption marker TRAP **(C)** and bone formation  
1231 marker P1NP **(D)** was detected in the sera of WT and *Daam2*<sup>*tm1a/tm1a*</sup> mice. Data in **(C)** and **(D)**  
1232 are shown as mean ± SEM; Females are on left and males on right.

1233  
1234 **Figure S13. Bone composition of *Daam2* knockdown and wildtype mice.** Bone composition  
1235 was measured in humeri from 16 week old male and female mice by Fourier Transformed  
1236 Infrared Spectroscopy (FTIR). **A)** Mineral to matrix ratio was determined as the ratio of the  
1237 integrated areas of the phosphate peak/amide I peak. **B)** Carbonate substitution was defined as  
1238 the ratio of the integrated areas of the carbonate/phosphate peaks. **C)** Collagen maturity or  
1239 collagen crosslinking was calculated as the ratio of the peak spectral intensities at 1660 and  
1240 1690 cm<sup>-1</sup> respectively. **D)** Crystallinity or crystal maturity was calculated as the ratio of the peak  
1241 spectral intensities at 1030 and 1020 cm<sup>-1</sup> respectively.

1242  
1243 **Figure S14. Increased bone mass, stiffness and strength in adult *Chromobox 1* heterozygous**  
1244 **deficient mice (*Cbx1*<sup>+/-</sup>)** **(a)** X-ray microradiography images of femur and caudal vertebrae from  
1245 female wild-type (WT) and *Cbx1*<sup>+/-</sup> mice at postnatal day 112 (P112). Graphs show reference  
1246 ranges derived from 320 WT mice, mean (solid line), 1.0SD (dotted lines) and 2.0SD (grey box).  
1247 Parameters from individual *Cbx1*<sup>+/-</sup> mice are shown as red dots and mean values as a black line  
1248 (n=2 animals). **(b)** Micro-CT images of proximal femur trabecular bone (left) and mid-diaphysis  
1249 cortical bone (right). Graphs showing trabecular bone volume/tissue volume (BV/TV), trabecular  
1250 number (Tb.N), trabecular thickness (Tb.Th), trabecular spacing (Tb.Sp), cortical thickness

1251 (Ct.Th), internal cortical diameter and cortical bone mineral density (BMD). **(c)** Graphs showing  
1252 yield load, maximum load, fracture load, stiffness and energy dissipated prior to fracture derived  
1253 from 3-point bend testing of femurs. **(d)** Graphs showing yield load, maximum load and stiffness  
1254 derived from compression testing of vertebra. Scale bars: a, 1mm and b, 0.5mm.

1255  
1256 **Figure S15.** Increased bone mass and strength in adult *WW Domain Containing Adaptor with*  
1257 *Coiled-Coil* heterozygous deficient mice (*Wac*<sup>+/-</sup>) **(a)** X-ray microradiography images of femur  
1258 and caudal vertebrae from female wild-type (WT) and *Wac*<sup>+/-</sup> mice at postnatal day 112 (P112).  
1259 Graphs show reference ranges derived from 320 WT mice, mean (solid line), 1.0SD (dotted  
1260 lines) and 2.0SD (grey box). Parameters from individual *Wac*<sup>+/-</sup> mice are shown as red dots and  
1261 mean values as a black line (n=2 animals). **(b)** Micro-CT images of proximal femur trabecular  
1262 bone (left) and mid-diaphysis cortical bone (right). Graphs showing trabecular bone  
1263 volume/tissue volume (BV/TV), trabecular number (Tb.N), trabecular thickness (Tb.Th),  
1264 trabecular spacing (Tb.Sp), cortical thickness (Ct.Th), internal cortical diameter and cortical  
1265 bone mineral density (BMD). **(c)** Graphs showing yield load, maximum load, fracture load,  
1266 stiffness and energy dissipated prior to fracture derived from 3-point bend testing of femurs. **(d)**  
1267 Graphs showing yield load, maximum load and stiffness derived from compression testing of  
1268 vertebra. Scale bars: a, 1mm and b, 0.5mm.

1269  
1270 **Figure S16.** Increased bone mineral content and strength in adult *DNA Replication and Sister*  
1271 *Chromatid Cohesion 1* heterozygous deficient mice (*Dscc1*<sup>+/-</sup>) **(a)** X-ray microradiography  
1272 images of femur and caudal vertebrae from female wild-type (WT) and *Dscc1*<sup>+/-</sup> mice at  
1273 postnatal day 112 (P112). Graphs show reference ranges derived from 320 WT mice, mean  
1274 (solid line), 1.0SD (dotted lines) and 2.0SD (grey box). Parameters from individual *Dscc1*<sup>+/-</sup> mice  
1275 are shown as red dots and mean values as a black line (n=2 animals). **(b)** Micro-CT images of  
1276 proximal femur trabecular bone (left) and mid-diaphysis cortical bone (right). Graphs showing  
1277 trabecular bone volume/tissue volume (BV/TV), trabecular number (Tb.N), trabecular thickness  
1278 (Tb.Th), trabecular spacing (Tb.Sp), cortical thickness (Ct.Th), internal cortical diameter and  
1279 cortical bone mineral density (BMD). **(c)** Graphs showing yield load, maximum load, fracture  
1280 load, stiffness and energy dissipated prior to fracture derived from 3-point bend testing of  
1281 femurs. **(d)** Graphs showing yield load, maximum load and stiffness derived from compression  
1282 testing of vertebra. Scale bars: a, 1mm and b, 0.5mm.

1283  
1284 **Figure S17.** Increased bone mineral content and strength in adult *DNA Regulator of Cell Cycle*  
1285 *knockout* mice (*Rgcc*<sup>-/-</sup>) **(a)** X-ray microradiography images of femur and caudal vertebrae from  
1286 female wild-type (WT) and *Rgcc*<sup>-/-</sup> mice at postnatal day 112 (P112). Graphs show reference  
1287 ranges derived from 320 WT mice, mean (solid line), 1.0SD (dotted lines) and 2.0SD (grey box).  
1288 Parameters from individual *Rgcc*<sup>-/-</sup> mice are shown as red dots and mean values as a black line  
1289 (n=2 animals). **(b)** Micro-CT images of proximal femur trabecular bone (left) and mid-diaphysis  
1290 cortical bone (right). Graphs showing trabecular bone volume/tissue volume (BV/TV), trabecular  
1291 number (Tb.N), trabecular thickness (Tb.Th), trabecular spacing (Tb.Sp), cortical thickness  
1292 (Ct.Th), internal cortical diameter and cortical bone mineral density (BMD). **(c)** Graphs showing  
1293 yield load, maximum load, fracture load, stiffness and energy dissipated prior to fracture derived  
1294 from 3-point bend testing of femurs. **(d)** Graphs showing yield load, maximum load and stiffness  
1295 derived from compression testing of vertebra. Scale bars: a, 1mm and b, 0.5mm.

1296  
1297 **Figure S18.** Increased bone mass and brittle bones in adult *Tyrosine 3-*  
1298 *Monooxygenase/Tryptophan 5-Monooxygenase Activation Protein Epsilon* knockout mice  
1299 (*Ywhae*<sup>-/-</sup>) **(a)** X-ray microradiography images of femur and caudal vertebrae from female wild-  
1300 type (WT) and *Ywhae*<sup>-/-</sup> mice at postnatal day 112 (P112). Graphs show reference ranges  
1301 derived from 320 WT mice, mean (solid line), 1.0SD (dotted lines) and 2.0SD (grey box).

1302 Parameters from individual *Ywhae*<sup>-/-</sup> mice are shown as red dots and mean values as a black  
1303 line (n=2 animals). **(b)** Micro-CT images of proximal femur trabecular bone (left) and mid-  
1304 diaphysis cortical bone (right). Graphs showing trabecular bone volume/tissue volume (BV/TV),  
1305 trabecular number (Tb.N), trabecular thickness (Tb.Th), trabecular spacing (Tb.Sp), cortical  
1306 thickness (Ct.Th), internal cortical diameter and cortical bone mineral density (BMD). **(c)** Graphs  
1307 showing yield load, maximum load, fracture load, stiffness and energy dissipated prior to  
1308 fracture derived from 3-point bend testing of femurs. **(d)** Graphs showing yield load, maximum  
1309 load and stiffness derived from compression testing of vertebra. Scale bars: a, 1mm and b,  
1310 0.5mm.

1311  
1312 **Figure S19.** Bone quality analysis from rapid throughput screening murine knockouts. **(a)** The  
1313 graphs demonstrate the relationship between bone mineral content and yield load, maximum  
1314 load, fracture load and stiffness in femurs from P112 female WT mice (N = 320). For yield load,  
1315 maximum load, and stiffness the blue line shows the linear regression (P = 0.005, P < 0.00001,  
1316 P = 0.003 respectively) and the grey box indicates ± 2SD. For fracture load the blue line shows  
1317 the linear regression (P = 0.00003) and the grey box indicates ± 95% confidence intervals. The  
1318 mean values for *Cbx1*<sup>+/-</sup>, *Dscc1*<sup>+/-</sup>, *Rgcc*<sup>-/-</sup>, *Wac*<sup>+/-</sup> and *Ywhae*<sup>-/-</sup> (N = 2 from OBCD screen) mice  
1319 are shown in orange. The *Wac*<sup>+/-</sup> femur yield load was 2.8 SD above the wild type reference  
1320 range and *Dscc1*<sup>+/-</sup> fracture load was on the 1.7<sup>th</sup> centile. **(b)** The graph demonstrates the  
1321 relationship between bone mineral content and yield load, maximum load and stiffness in  
1322 vertebrae from P112 female WT mice (N = 320). For yield and maximum loads the blue line  
1323 shows the linear regression (P = <0.00001) and the grey box indicates ± 95% confidence  
1324 intervals. For stiffness the blue line shows the linear regression (P = 0.0001) and the grey box  
1325 indicates ± 2SD. The mean values for *Cbx1*<sup>+/-</sup>, *Dscc1*<sup>+/-</sup>, *Rgcc*<sup>-/-</sup>, *Wac*<sup>+/-</sup> and *Ywhae*<sup>-/-</sup> (N = 2 from  
1326 OBCD screen) mice are shown in orange.

1327  
1328 **Figure S20. Bivariate scatterplots describing pairwise comparisons of each of the first 20**  
1329 **ancestry informative principal components derived from unrelated subjects of the 1000**  
1330 **Genomes study.** Data points represent subjects that are coloured according to their predefined  
1331 1000 genomes study population\*. Pairwise combinations involving eigenvectors 1,2 and 5  
1332 represented the smallest number of eigenvectors that were able to adequately resolve the  
1333 British sub-population (GBR) from other ethnicities and were subsequently used to for clustering  
1334 and ancestry assignment of the UK Biobank sample. \*CHB=Han Chinese in Beijing, China,  
1335 JPT=Japanese in Tokyo, Japan, CHS=Southern Han Chinese, CDX=Chinese Dai in  
1336 Xishuangbanna, China, KHV=Kinh in Ho Chi Minh City, Vietnam, CEU=Utah Residents (CEPH)  
1337 with Northern and Western European Ancestry, TSI=Toscani in Italia, FIN=Finnish in Finland,  
1338 GBR=British in England and Scotland, IBS=Iberian Population in Spain, YRI=Yoruba in Ibadan,  
1339 Nigeria, LWK=Luhya in Webuye, Kenya, GWD=Gambian in Western Divisions in the Gambia,  
1340 MSL=Mende in Sierra Leone, ESN=Esan in Nigeria, ASW=Americans of African Ancestry in SW  
1341 USA, ACB=African Caribbeans in Barbados, MXL=Mexican Ancestry from Los Angeles USA,  
1342 PUR=Puerto Ricans from Puerto Rico, CLM=Colombians from Medellin, Colombia,  
1343 PEL=Peruvians from Lima, Peru, GIH=Gujarati Indian from Houston, Texas, PJI=Punjabi from  
1344 Lahore, Pakistan, BEB=Bengali from Bangladesh, STU=Sri Lankan Tamil from the UK,  
1345 ITU=Indian Telugu from the UK

1346  
1347 **Figure S21. Evaluating expectation maximization clustering model fit.** The number of  
1348 predefined clusters is described on the x-axis and model fit on the y-axis [Inferred by three  
1349 model selection criteria: i.e. log-likelihood (LogL), Akaike information criteria (AIC), and  
1350 Bayesian information criterion (BIC)]. Twelve predefined clusters were chosen for clustering as  
1351 sensitivity analyses suggested that this number provided a good compromise between model fit  
1352 and computational burden (i.e. more clusters requires more computation).

1353  
1354 **Figure S22. Bivariate scatterplots describing pairwise comparisons of ancestry**  
1355 **informative principal components 1,2 and 5 derived from unrelated subjects of the 1000**  
1356 **genomes study and all subjects from the UK Biobank sample.** Data points represent  
1357 subjects that are coloured according to their allocated cluster, as estimated by Expectation  
1358 Maximization (EM) clustering. Samples from the UK-Biobank sample are annotated using  
1359 “UKB”. Other 1000 genomes populations are annotated using the following: CHB=Han Chinese  
1360 in Beijing, China, JPT=Japanese in Tokyo, Japan, CHS=Southern Han Chinese, CDX=Chinese  
1361 Dai in Xishuangbanna, China, KHV=Kinh in Ho Chi Minh City, Vietnam, CEU=Utah Residents  
1362 (CEPH) with Northern and Western European Ancestry, TSI=Toscans in Italia, FIN=Finnish in  
1363 Finland, GBR=British in England and Scotland, IBS=Iberian Population in Spain, YRI=Yoruba in  
1364 Ibadan, Nigeria, LWK=Luhya in Webuye, Kenya, GWD=Gambian in Western Divisions in the  
1365 Gambia, MSL=Mende in Sierra Leone, ESN=Esan in Nigeria, ASW=Americans of African  
1366 Ancestry in SW USA, ACB=African Caribbeans in Barbados, MXL=Mexican Ancestry from Los  
1367 Angeles USA, PUR=Puerto Ricans from Puerto Rico, CLM=Colombians from Medellin,  
1368 Colombia, PEL=Peruvians from Lima, Peru, GIH=Gujarati Indian from Houston, Texas,  
1369 PJI=Punjabi from Lahore, Pakistan, BEB=Bengali from Bangladesh, STU=Sri Lankan Tamil  
1370 from the UK, ITU=Indian Telugu from the UK.

1371  
1372 **Figure S23. Targeting DAAM2 exon 2 with CRISPR/Cas9 induced double stranded breaks**  
1373 **reduced DAAM2 protein level in SaOS-2 cells. A)** DAAM2 protein level quantification in  
1374 control cells and edited DAAM2 cells (gRNA1 and gRNA2). Bars represent the mean of six  
1375 independent experiments  $\pm$  SEM. \*\*\* represent  $P < 0.001$  compared to control cells determined  
1376 by one-way Anova and Bonferroni post-hoc tests. **B)** Bands from representative Western Blots  
1377 of DAAM2 (upper panel) and total protein (lower panel) of at least six independent experiments  
1378 from different cell line passages. Ct: controls; gRNA1: *DAAM2* edited cells with gRNA1; gRNA2:  
1379 *DAAM2* edited cells with gRNA2.

1380 **Tables**

1381 **Table 1.** Target gene identification methods enrichment for 57 positive control genes. No  
 1382 positive control genes were identified by osteocyte Hi-C interactions therefore we did not  
 1383 calculate its enrichment. Distance to gene was determined using 3' and 5' ends, instead  
 1384 of the transcription start site.  
 1385

| <i>Target Gene Set</i>                  | <i>OR (95% CI)</i>  | <i>P</i>              |
|-----------------------------------------|---------------------|-----------------------|
| <i>SaOS-2 ATAC-seq Peak Gene</i>        | 58.5 (26.4 – 129.3) | 1.3x10 <sup>-75</sup> |
| <i>Coding SNP Gene</i>                  | 41.8 (14.3 – 121.6) | 1.0x10 <sup>-30</sup> |
| <i>Osteoblast Hi-C Interaction Gene</i> | 21.1 (6.4 – 69.6)   | 7.8x10 <sup>-13</sup> |
| <i>Closest Gene</i>                     | 12.9 (7.1 – 23.4)   | 1.8x10 <sup>-27</sup> |
| <i>Overlapping Gene Body</i>            | 11.2 (5.2 – 23.8)   | 3.4x10 <sup>-15</sup> |
| <i>All Genes Within 100 kbp</i>         | 6.8 (3.9 – 11.7)    | 2.1x10 <sup>-15</sup> |
| <i>Osteocyte Hi-C Interaction Gene</i>  | NA                  | NA                    |

1386  
 1387 **Table 2.** Target gene identification methods enrichment for 1,240 osteocyte signature genes.  
 1388 Distance to gene was determined using 3' and 5' ends, instead of the transcription start  
 1389 site.  
 1390

| <i>Target Gene Set</i>                  | <i>OR (95% CI)</i> | <i>P</i>              |
|-----------------------------------------|--------------------|-----------------------|
| <i>Coding SNP Gene</i>                  | 7.4 (3.8 - 14.5)   | 5.2x10 <sup>-12</sup> |
| <i>SaOS-2 ATAC-seq Peak Gene</i>        | 6.1 (3.5 - 10.6)   | 2.6x10 <sup>-13</sup> |
| <i>Overlapping Gene Body</i>            | 5.1 (3.8 - 6.7)    | 1.1x10 <sup>-37</sup> |
| <i>Closest Gene</i>                     | 4.6 (3.7 - 5.6)    | 4.1x10 <sup>-53</sup> |
| <i>Osteoblast Hi-C Interaction Gene</i> | 3.8 (1.9 – 7.4)    | 2.5x10 <sup>-5</sup>  |
| <i>Osteocyte Hi-C Interaction Gene</i>  | 2.9 (1.0 – 8.6)    | 4.0.x10 <sup>-2</sup> |
| <i>All Genes Within 100 kbp</i>         | 2.1 (1.7 - 2.5)    | 1.8x10 <sup>-17</sup> |

1391

## 1392 **Acknowledgments**

1393 This research has been conducted using the UK Biobank Resource (accession IDs: 24268,  
1394 12703 and 4580). J.B.R. was supported by the Canadian Institutes of Health Research, the  
1395 Canadian Foundation for Innovation and the Fonds de Recherche Santé Québec (FRSQ) and a  
1396 FRQS Clinical Research Scholarship. TwinsUK is funded by the Wellcome Trust, Medical  
1397 Research Council, European Union, the National Institute for Health Research (NIHR)-funded  
1398 BioResource, Clinical Research Facility and Biomedical Research Centre based at Guy's and St  
1399 Thomas' NHS Foundation Trust in partnership with King's College London. J.A.M was funded  
1400 by the Canadian Institutes of Health Research. D.M.E. was funded by a National Health and  
1401 Medical Research Council Senior Research Fellowship (APP1137714) and funded by a Medical  
1402 Research Council Programme Grant (MC\_UU\_12013/4). J.P.K was funded by a University of  
1403 Queensland Development Fellowship. CLG was funded by Arthritis Research UK (ref; 20000).  
1404 G.R.W., J.H.D.B. and P.I.C. were funded by the Wellcome Trust (Strategic Award grant number  
1405 101123; project grant 094134) and P.I.C was also funded by the Mrs Janice Gibson and the  
1406 Ernest Heine Family Foundation. D.K. was supported by Israel Science Foundation grant  
1407 #1283/14. Y.-H.H. was funded by US NIH NIAMS 1R01AR072199. F.R., C.M.-G., and K.T. were  
1408 funded by the Netherlands Organization for Health Research and Development (ZonMw VIDI  
1409 016.136.361 grant). C.L.A.-B. was funded by NIH/NIAMS AR063702 AR060981. D.P.K. was  
1410 funded by grants from the National Institute of Arthritis Musculoskeletal and Skin Diseases R01  
1411 AR041398, R01 AR072199. S.Y. was funded by the Australian Government Research Training  
1412 Program Scholarship. J.R. and S.K. were funded by the Genetic Factors of Osteoporosis-  
1413 GEFOS EU FP7 Integrated Project Grant Reference: 201865 2008-12 and 2007-12 UK NIHR  
1414 Biomedical Research Centre Grant (Musculoskeletal theme) to Cambridge Clinical School. C.O.  
1415 was supported by the Swedish Research Council, Swedish Foundation for Strategic Research,  
1416 ALF/LUA research grant from the Sahlgrenska University Hospital, Lundberg Foundation,  
1417 European Calcified Tissue Society, Torsten and Ragnar Söderberg's Foundation, Novo Nordisk  
1418 Foundation, Knut and Alice Wallenberg Foundation.

1419  
1420 We thank M. Schull for assistance with high-performance computing at the University of  
1421 Queensland Diamantina Institute, and T. Winkler for invaluable technical support for the  
1422 EasyStrata Software used in this study. We thank the Sanger Institute's Research Support  
1423 Facility, Mouse Pipelines and Mouse Informatics Group who generated the mice and collected  
1424 materials for this manuscript. We would like to thank the research participants and employees of  
1425 23andMe for making this work possible. The following members of the 23andMe Research  
1426 Team contributed to this study: Michelle Agee, Babak Alipanahi, Adam Auton, Robert K. Bell,  
1427 Katarzyna Bryc, Sarah L. Elson, Pierre Fontanillas, Nicholas A. Furlotte, Jennifer C. McCreight,  
1428 Karen E. Huber, Nadia K. Litterman, Matthew H. McIntyre, Joanna L. Mountain, Elizabeth S.  
1429 Noblin, Carrie A.M. Northover, Steven J. Pitts, J. Fah Sathirapongsasuti, Olga V. Sazonova,  
1430 Janie F. Shelton, Suyash Shringarpure, Chao Tian, Joyce Y. Tung, Vladimir Vacic, and  
1431 Catherine H. Wilson.

1432



## 1433 References

- 1434 1. World Health Organization. Consensus development conference: prophylaxis and  
1435 treatment of osteoporosis. *Osteoporos. Int.* **1**, 114–117 (1991).
- 1436 2. Richards, J. B., Zheng, H.-F. & Spector, T. D. Genetics of osteoporosis from genome-  
1437 wide association studies: advances and challenges. *Nat. Rev. Genet.* **13**, 576–588  
1438 (2012).
- 1439 3. Johnell, O. *et al.* Predictive value of BMD for hip and other fractures. *J. Bone Miner. Res.*  
1440 **20**, 1185–1194 (2005).
- 1441 4. Kemp, J. P. *et al.* Identification of 153 new loci associated with heel bone mineral density  
1442 and functional involvement of GPC6 in osteoporosis. *Nat. Genet.* (2017).  
1443 doi:10.1038/ng.3949
- 1444 5. Arden, N. K., Baker, J., Hogg, C., Baan, K. & Spector, T. D. The heritability of bone  
1445 mineral density, ultrasound of the calcaneus and hip axis length: a study of  
1446 postmenopausal twins. *J Bone Min. Res* **11**, 530–534 (1996).
- 1447 6. Hunter, D. J. *et al.* Genetic variation in bone mineral density and calcaneal ultrasound: A  
1448 study of the influence of menopause using female twins. *Osteoporos. Int.* **12**, 406–411  
1449 (2001).
- 1450 7. Bauer, D. C. Broadband Ultrasound Attenuation Predicts Fractures Strongly and  
1451 Independently of Densitometry in Older Women. *Arch. Intern. Med.* **157**, 629 (1997).
- 1452 8. Bauer, D. C. *et al.* Quantitative ultrasound predicts hip and non-spine fracture in men:  
1453 The MrOS study. *Osteoporos. Int.* **18**, 771–777 (2007).
- 1454 9. Karasik, D. *et al.* Mapping of Quantitative Ultrasound of the Calcaneus Bone to  
1455 Chromosome 1 by Genome-Wide Linkage Analysis. *Osteoporos. Int.* **13**, 796–802 (2002).
- 1456 10. Medina-Gomez, C. *et al.* Life-Course Genome-wide Association Study Meta-analysis of  
1457 Total Body BMD and Assessment of Age-Specific Effects. *Am. J. Hum. Genet.* **102**, 88–  
1458 102 (2018).
- 1459 11. McCloskey, E. V. *et al.* Predictive ability of heel quantitative ultrasound for incident  
1460 fractures: an individual-level meta-analysis. *Osteoporos. Int.* **26**, 1979–1987 (2015).
- 1461 12. Timpson, N. J., Greenwood, C. M. T., Soranzo, N., Lawson, D. J. & Richards, J. B.  
1462 Genetic architecture: the shape of the genetic contribution to human traits and disease.  
1463 *Nat. Rev. Genet.* (2017). doi:10.1038/nrg.2017.101
- 1464 13. Eriksson, A. L. *et al.* Genetic Determinants of Circulating Estrogen Levels, and Evidence  
1465 of a Causal Effect of Estradiol on Bone Density in Men. *J. Clin. Endocrinol. Metab.*  
1466 (2018). doi:10.1210/jc.2017-02060
- 1467 14. Ohlsson, C. *et al.* Genetic determinants of serum testosterone concentrations in men.  
1468 *PLoS Genet.* **7**, e1002313 (2011).
- 1469 15. Yong, W. *et al.* Essential role for Co-chaperone Fkbp52 but not Fkbp51 in androgen  
1470 receptor-mediated signaling and physiology. *J. Biol. Chem.* **282**, 5026–36 (2007).
- 1471 16. He, C. *et al.* Genome-wide association studies identify loci associated with age at  
1472 menarche and age at natural menopause. *Nat. Genet.* **41**, 724–8 (2009).
- 1473 17. Bulik-Sullivan, B. *et al.* An atlas of genetic correlations across human diseases and traits.  
1474 *Nat. Genet.* **47**, 1236–1241 (2015).
- 1475 18. McLaren, W. *et al.* The Ensembl Variant Effect Predictor. *Genome Biol.* **17**, 122 (2016).
- 1476 19. Yang, J. *et al.* Conditional and joint multiple-SNP analysis of GWAS summary statistics  
1477 identifies additional variants influencing complex traits. *Nat. Publ. Gr.* **44**, 369–375  
1478 (2012).
- 1479 20. Benner, C. *et al.* FINEMAP: Efficient variable selection using summary data from  
1480 genome-wide association studies. *Bioinformatics* **32**, 1493–1501 (2016).
- 1481 21. Thurman, R. E. *et al.* The accessible chromatin landscape of the human genome. *Nature*  
1482 **489**, 75–82 (2012).
- 1483 22. Rivadeneira, F. & Makitie, O. Osteoporosis and Bone Mass Disorders: From Gene

- 1484 Pathways to Treatments. *Trends Endocrinol. Metab.* **27**, 262–281 (2016).
- 1485 23. Watanabe, K., Taskesen, E., van Bochoven, A. & Posthuma, D. Functional mapping and  
1486 annotation of genetic associations with FUMA. *Nat. Commun.* **8**, 1826 (2017).
- 1487 24. Kutmon, M. *et al.* WikiPathways: capturing the full diversity of pathway knowledge.  
1488 *Nucleic Acids Res.* **44**, D488–D494 (2016).
- 1489 25. Dallas, S. L. & Bonewald, L. F. Dynamics of the transition from osteoblast to osteocyte.  
1490 *Ann. N. Y. Acad. Sci.* **1192**, 437–443 (2010).
- 1491 26. Youlten, S. *et al.* Osteocytes express a unique transcriptome that underpins skeletal  
1492 homeostasis. in *American Society of Bone and Mineral Research* (2017).
- 1493 27. Lee, H. K. & Deneen, B. Daam2 is required for dorsal patterning via modulation of  
1494 canonical Wnt signaling in the developing spinal cord. *Dev. Cell* **22**, 183–96 (2012).
- 1495 28. Lee, H. K. *et al.* Daam2-PIP5K Is a Regulatory Pathway for Wnt Signaling and  
1496 Therapeutic Target for Remyelination in the CNS. *Neuron* **85**, 1227–1243 (2015).
- 1497 29. Donnelly, E., Chen, D. X., Boskey, A. L., Baker, S. P. & van der Meulen, M. C. H.  
1498 Contribution of mineral to bone structural behavior and tissue mechanical properties.  
1499 *Calcif. Tissue Int.* **87**, 450–60 (2010).
- 1500 30. Bannister, A. J. *et al.* Selective recognition of methylated lysine 9 on histone H3 by the  
1501 HP1 chromo domain. *Nature* **410**, 120–4 (2001).
- 1502 31. DeSanto, C. *et al.* WAC loss-of-function mutations cause a recognisable syndrome  
1503 characterised by dysmorphic features, developmental delay and hypotonia and  
1504 recapitulate 10p11.23 microdeletion syndrome. *J. Med. Genet.* **52**, 754–61 (2015).
- 1505 32. Bermudez, V. P. *et al.* The alternative Ctf18-Dcc1-Ctf8-replication factor C complex  
1506 required for sister chromatid cohesion loads proliferating cell nuclear antigen onto DNA.  
1507 *Proc. Natl. Acad. Sci. U. S. A.* **100**, 10237–42 (2003).
- 1508 33. Saigusa, K. *et al.* RGC32, a novel p53-inducible gene, is located on centrosomes during  
1509 mitosis and results in G2/M arrest. *Oncogene* **26**, 1110–21 (2007).
- 1510 34. Nefla, M. *et al.* The pro-inflammatory cytokine 14-3-3 $\epsilon$  is a ligand of CD13 in cartilage. *J.*  
1511 *Cell Sci.* **128**, 3250–62 (2015).
- 1512 35. Nagamani, S. C. S. *et al.* Microdeletions including YWHAE in the Miller-Dieker syndrome  
1513 region on chromosome 17p13.3 result in facial dysmorphisms, growth restriction, and  
1514 cognitive impairment. *J. Med. Genet.* **46**, 825–33 (2009).
- 1515 36. Visscher, P. M. *et al.* 10 Years of GWAS Discovery: Biology, Function, and Translation.  
1516 *Am. J. Hum. Genet.* **101**, 5–22 (2017).
- 1517 37. Nelson, M. R. *et al.* The support of human genetic evidence for approved drug  
1518 indications. *Nat. Genet.* **47**, 856–860 (2015).
- 1519 38. Bone, H. G. *et al.* 10 years of denosumab treatment in postmenopausal women with  
1520 osteoporosis: results from the phase 3 randomised FREEDOM trial and open-label  
1521 extension. *lancet. Diabetes Endocrinol.* **5**, 513–523 (2017).
- 1522 39. Moayeri, A. *et al.* Quantitative ultrasound of the heel and fracture risk assessment: An  
1523 updated meta-analysis. *Osteoporos. Int.* **23**, 143–153 (2012).
- 1524 40. Grundberg, E. *et al.* Population genomics in a disease targeted primary cell model.  
1525 *Genome Res.* **19**, 1942–1952 (2009).
- 1526 41. Sudlow, C. *et al.* UK Biobank: An Open Access Resource for Identifying the Causes of a  
1527 Wide Range of Complex Diseases of Middle and Old Age. *PLOS Med.* **12**, e1001779  
1528 (2015).
- 1529 42. McCarthy, S. *et al.* A reference panel of 64,976 haplotypes for genotype imputation. *Nat.*  
1530 *Genet.* **48**, 1279–1283 (2016).
- 1531 43. Bycroft, C. *et al.* Genome-wide genetic data on ~500,000 UK Biobank participants.  
1532 *bioRxiv* 166298 (2017). doi:10.1101/166298
- 1533 44. Auton, A. *et al.* A global reference for human genetic variation. *Nature* **526**, 68–74 (2015).
- 1534 45. Galinsky, K. J. *et al.* Fast Principal-Component Analysis Reveals Convergent Evolution of

- 1535 ADH1B in Europe and East Asia. *Am. J. Hum. Genet.* **98**, 456–472 (2016).
- 1536 46. Altshuler, D. M. *et al.* Integrating common and rare genetic variation in diverse human  
1537 populations. *Nature* **467**, 52–58 (2010).
- 1538 47. Chen, W.-C. & Maitra, R. EM Algorithm for Model-Based Clustering of Finite Mixture  
1539 Gaussian Distribution. R package (2015).
- 1540 48. Yang, J., Lee, S. H., Goddard, M. E. & Visscher, P. M. GCTA: a tool for genome-wide  
1541 complex trait analysis. *Am J Hum Genet* **88**, 76–82 (2011).
- 1542 49. Loh, P.-R. *et al.* Efficient Bayesian mixed-model analysis increases association power in  
1543 large cohorts. *Nat. Genet.* **47**, 284–290 (2015).
- 1544 50. Chang, C. C. *et al.* Second-generation PLINK: rising to the challenge of larger and richer  
1545 datasets. *Gigascience* **4**, 7 (2015).
- 1546 51. Winkler, T. W. *et al.* EasyStrata: evaluation and visualization of stratified genome-wide  
1547 association meta-analysis data. *Bioinformatics* **31**, 259–61 (2015).
- 1548 52. Cochran, W. G. The Combination of Estimates from Different Experiments. *Biometrics* **10**,  
1549 101 (1954).
- 1550 53. Willer, C. J., Li, Y. & Abecasis, G. R. METAL: fast and efficient meta-analysis of  
1551 genomewide association scans. *Bioinformatics* **26**, 2190–2191 (2010).
- 1552 54. Quinlan, A. R. & Hall, I. M. BEDTools: a flexible suite of utilities for comparing genomic  
1553 features. *Bioinformatics* **26**, 841–842 (2010).
- 1554 55. Bulik-Sullivan, B. K. *et al.* LD Score regression distinguishes confounding from  
1555 polygenicity in genome-wide association studies. *Nat. Genet.* **47**, 291–295 (2015).
- 1556 56. Witte, J. S., Visscher, P. M. & Wray, N. R. The contribution of genetic variants to disease  
1557 depends on the ruler. *Nat. Rev. Genet.* **15**, 765–776 (2014).
- 1558 57. Chapman, J. M., Cooper, J. D., Todd, J. A. & Clayton, D. G. Detecting disease  
1559 associations due to linkage disequilibrium using haplotype tags: a class of tests and the  
1560 determinants of statistical power. *Hum. Hered.* **56**, 18–31 (2003).
- 1561 58. Spencer, C. C. A. *et al.* Designing Genome-Wide Association Studies: Sample Size,  
1562 Power, Imputation, and the Choice of Genotyping Chip. *PLoS Genet.* **5**, e1000477  
1563 (2009).
- 1564 59. Finucane, H. K. *et al.* Partitioning heritability by functional annotation using genome-wide  
1565 association summary statistics. *Nat. Genet.* **47**, 1228–35 (2015).
- 1566 60. Benner, C. *et al.* Prospects of Fine-Mapping Trait-Associated Genomic Regions by Using  
1567 Summary Statistics from Genome-wide Association Studies. *Am. J. Hum. Genet.* **101**,  
1568 539–551 (2017).
- 1569 61. Hart, T., Komori, H. K., LaMere, S., Podshivalova, K. & Salomon, D. R. Finding the active  
1570 genes in deep RNA-seq gene expression studies. *BMC Genomics* **14**, 778 (2013).
- 1571 62. Buenrostro, J. D., Giresi, P. G., Zaba, L. C., Chang, H. Y. & Greenleaf, W. J.  
1572 Transposition of native chromatin for fast and sensitive epigenomic profiling of open  
1573 chromatin, DNA-binding proteins and nucleosome position. *Nat. Methods* **10**, 1213–1218  
1574 (2013).
- 1575 63. Bolger, A. M., Lohse, M. & Usadel, B. Trimmomatic: a flexible trimmer for Illumina  
1576 sequence data. *Bioinformatics* **30**, 2114–20 (2014).
- 1577 64. Li, H. & Durbin, R. Fast and accurate short read alignment with Burrows-Wheeler  
1578 transform. *Bioinformatics* **25**, 1754–1760 (2009).
- 1579 65. Dobin, A. *et al.* STAR: ultrafast universal RNA-seq aligner. *Bioinformatics* **29**, 15–21  
1580 (2013).
- 1581 66. Anders, S., Pyl, P. T. & Huber, W. HTSeq--a Python framework to work with high-  
1582 throughput sequencing data. *Bioinformatics* **31**, 166–169 (2015).
- 1583 67. Kalajzic, I. *et al.* Expression profile of osteoblast lineage at defined stages of  
1584 differentiation. *J. Biol. Chem.* **280**, 24618–26 (2005).
- 1585 68. Schmitt, A. D. *et al.* A Compendium of Chromatin Contact Maps Reveals Spatially Active

- 1586 Regions in the Human Genome. *Cell Rep.* **17**, 2042–2059 (2016).
- 1587 69. Rao, S. S. P. *et al.* A 3D map of the human genome at kilobase resolution reveals  
1588 principles of chromatin looping. *Cell* **159**, 1665–1680 (2014).
- 1589 70. Belaghzal, H., Dekker, J. & Gibcus, J. H. Hi-C 2.0: An optimized Hi-C procedure for high-  
1590 resolution genome-wide mapping of chromosome conformation. *Methods* **123**, 56–65  
1591 (2017).
- 1592 71. Servant, N. *et al.* HiC-Pro: an optimized and flexible pipeline for Hi-C data processing.  
1593 *Genome Biol.* **16**, 259 (2015).
- 1594 72. Heinz, S. *et al.* Simple combinations of lineage-determining transcription factors prime  
1595 cis-regulatory elements required for macrophage and B cell identities. *Mol. Cell* **38**, 576–  
1596 89 (2010).
- 1597 73. Mifsud, B. *et al.* GOTHIC, a probabilistic model to resolve complex biases and to identify  
1598 real interactions in Hi-C data. *PLoS One* **12**, e0174744 (2017).
- 1599 74. Durand, N. C. *et al.* Juicer Provides a One-Click System for Analyzing Loop-Resolution  
1600 Hi-C Experiments. *Cell Syst.* **3**, 95–8 (2016).
- 1601 75. Doench, J. G. *et al.* Optimized sgRNA design to maximize activity and minimize off-target  
1602 effects of CRISPR-Cas9. *Nat. Biotechnol.* **34**, 184–191 (2016).
- 1603 76. Haeussler, M. *et al.* Evaluation of off-target and on-target scoring algorithms and  
1604 integration into the guide RNA selection tool CRISPOR. *Genome Biol.* **17**, 148 (2016).
- 1605 77. Bassett, J. H. D. *et al.* Rapid-Throughput Skeletal Phenotyping of 100 Knockout Mice  
1606 Identifies 9 New Genes That Determine Bone Strength. *PLoS Genet.* **8**, (2012).
- 1607 78. Bassett, J. H. D., van der Spek, A., Gogakos, A. & Williams, G. R. Quantitative X-ray  
1608 imaging of rodent bone by Faxitron. *Methods Mol. Biol.* **816**, 499–506 (2012).
- 1609 79. Bassett, J. H. D. *et al.* Optimal bone strength and mineralization requires the type 2  
1610 iodothyronine deiodinase in osteoblasts. *Proc. Natl. Acad. Sci. U. S. A.* **107**, 7604–9  
1611 (2010).
- 1612 80. Esapa, C. T. *et al.* Bone Mineral Content and Density. *Curr. Protoc. Mouse Biol.* **2**, 365–  
1613 400 (2012).
- 1614 81. Bassett, J. H. D. *et al.* Thyrostimulin Regulates Osteoblastic Bone Formation During Early  
1615 Skeletal Development. *Endocrinology* **156**, 3098–3113 (2015).
- 1616 82. Quinn, J. M. *et al.* Calcitonin receptor antibodies in the identification of osteoclasts. *Bone*  
1617 **25**, 1–8 (1999).
- 1618 83. Lee, N. J. *et al.* Critical role for Y1 receptors in mesenchymal progenitor cell  
1619 differentiation and osteoblast activity. *J. Bone Miner. Res.* **25**, 1736–47 (2010).
- 1620 84. Gourion-Arsiquaud, S., West, P. A. & Boskey, A. L. Fourier transform-infrared  
1621 microspectroscopy and microscopic imaging. *Methods Mol. Biol.* **455**, 293–303 (2008).
- 1622

Figure 1

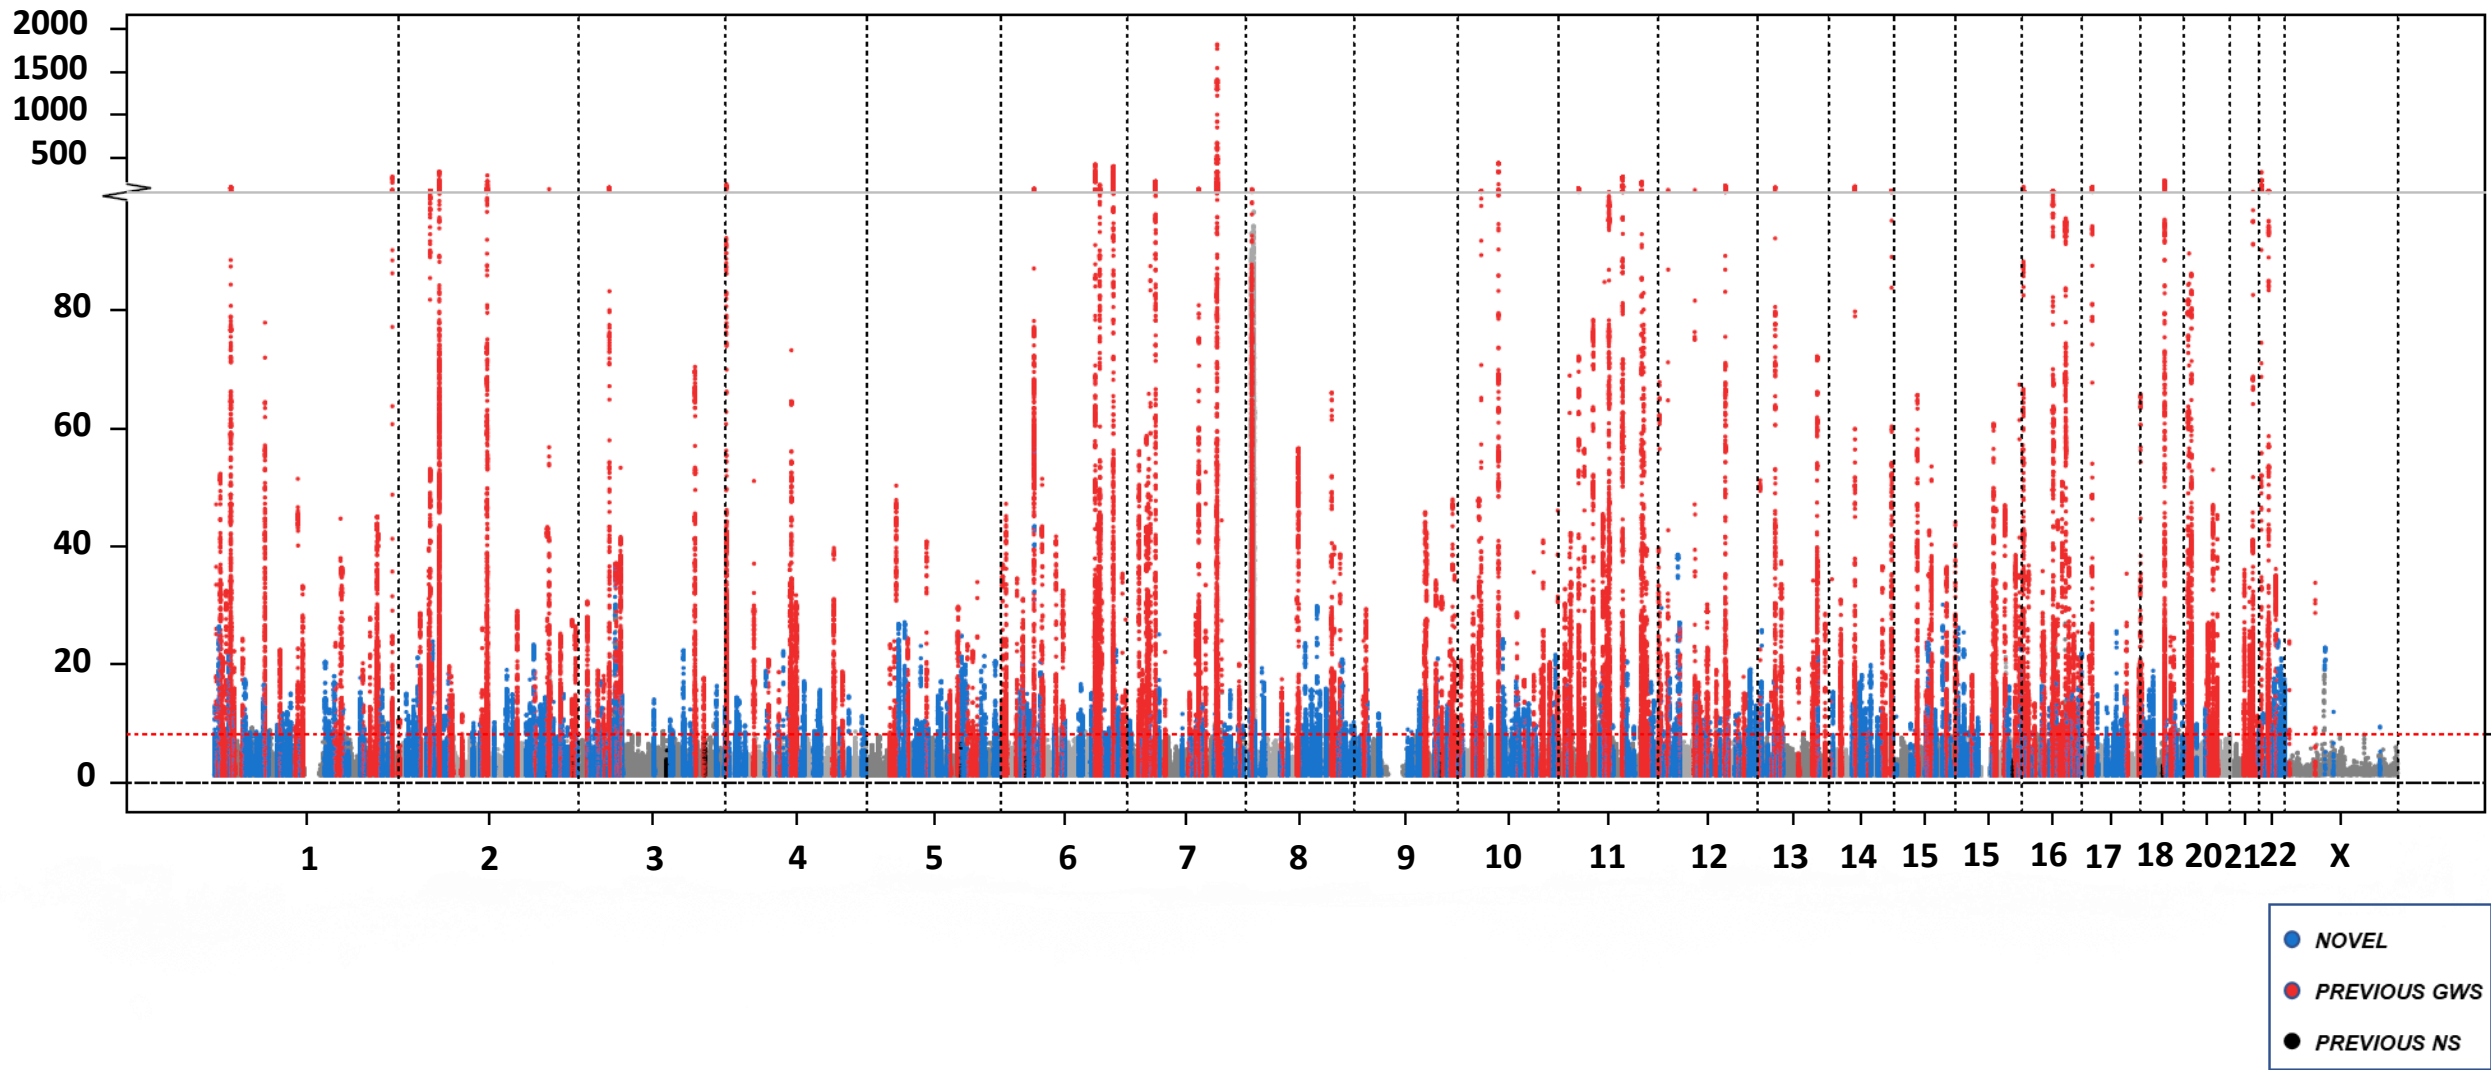

Figure 2

a

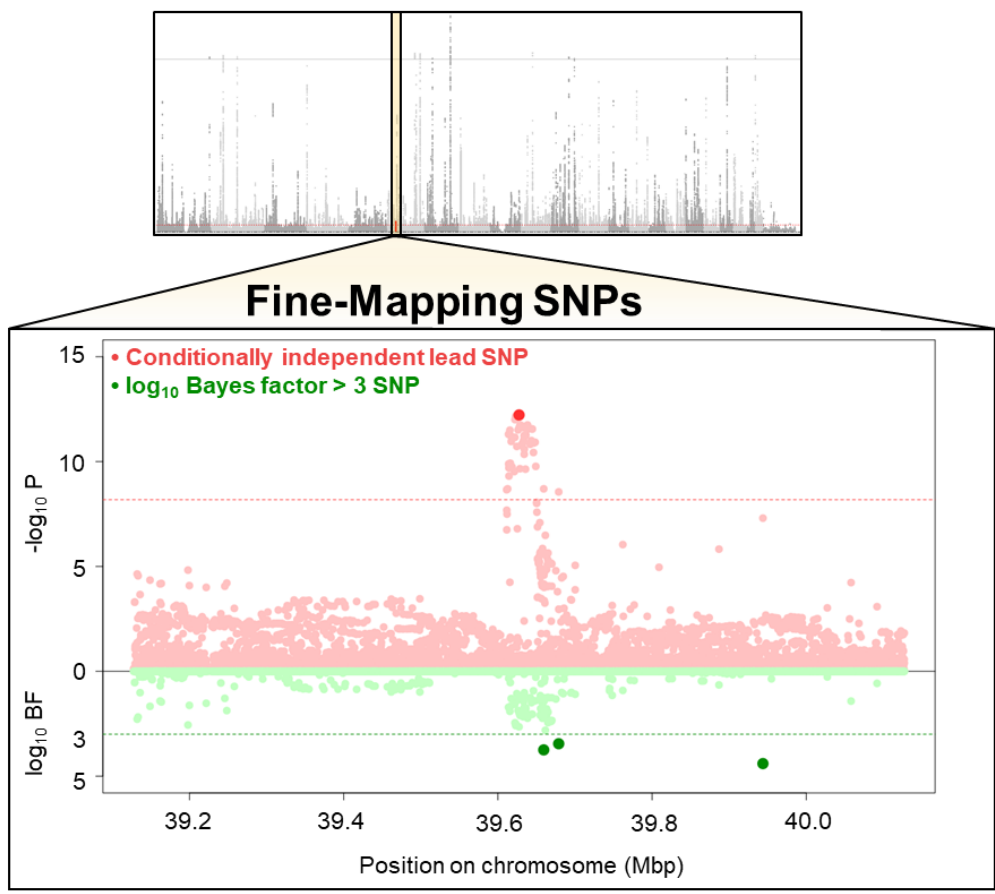

b

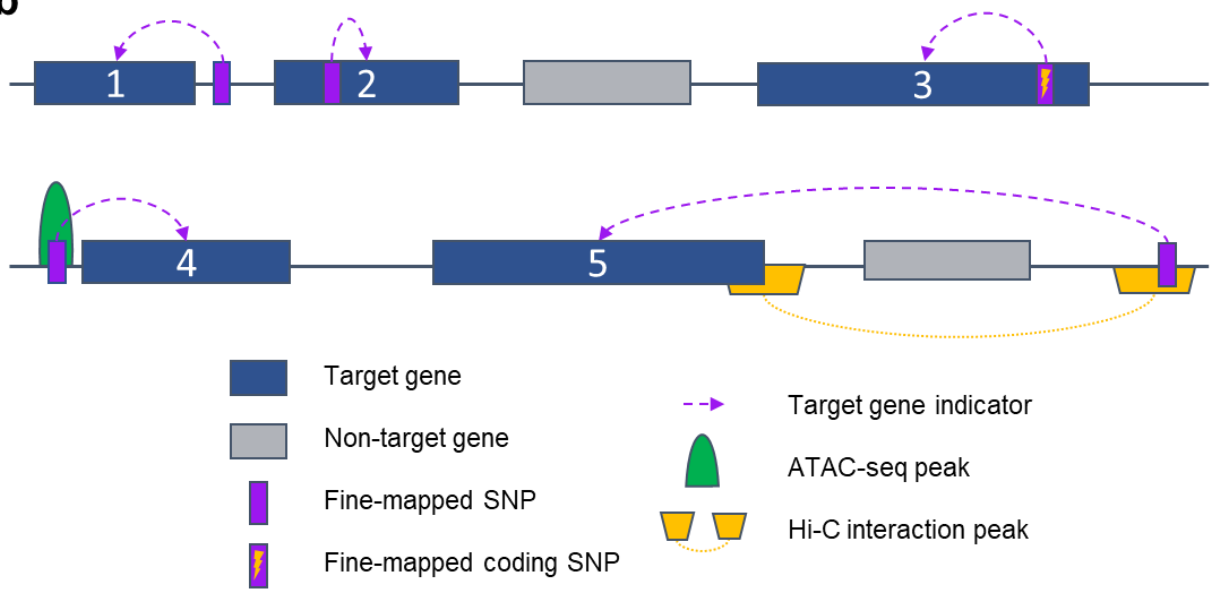

Figure 3

a

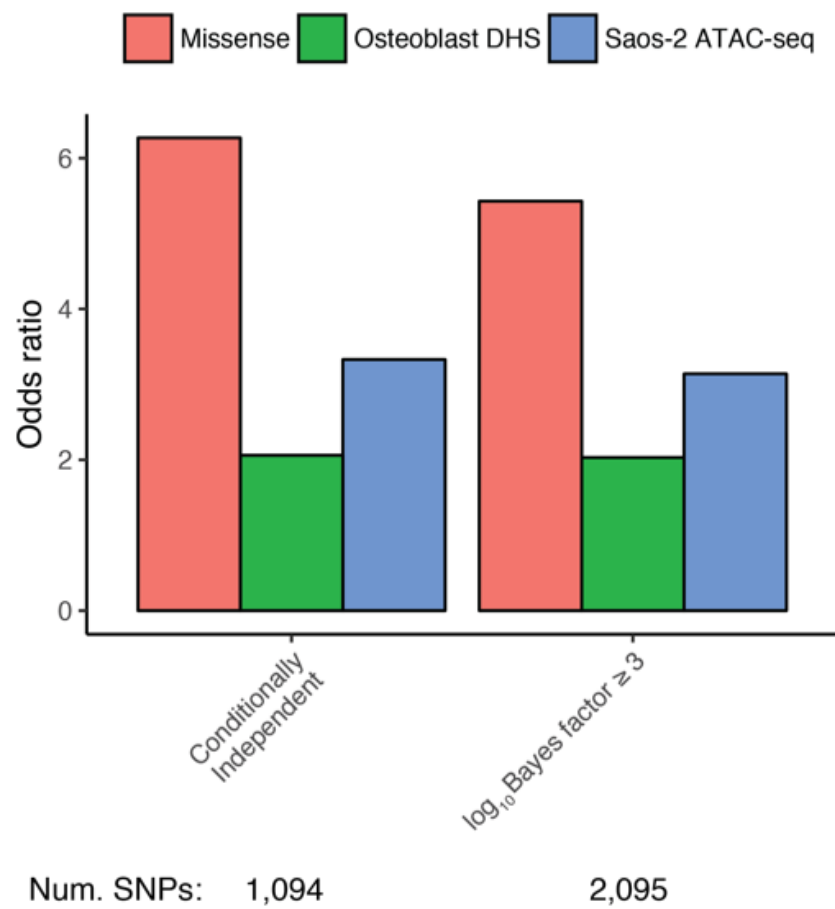

b

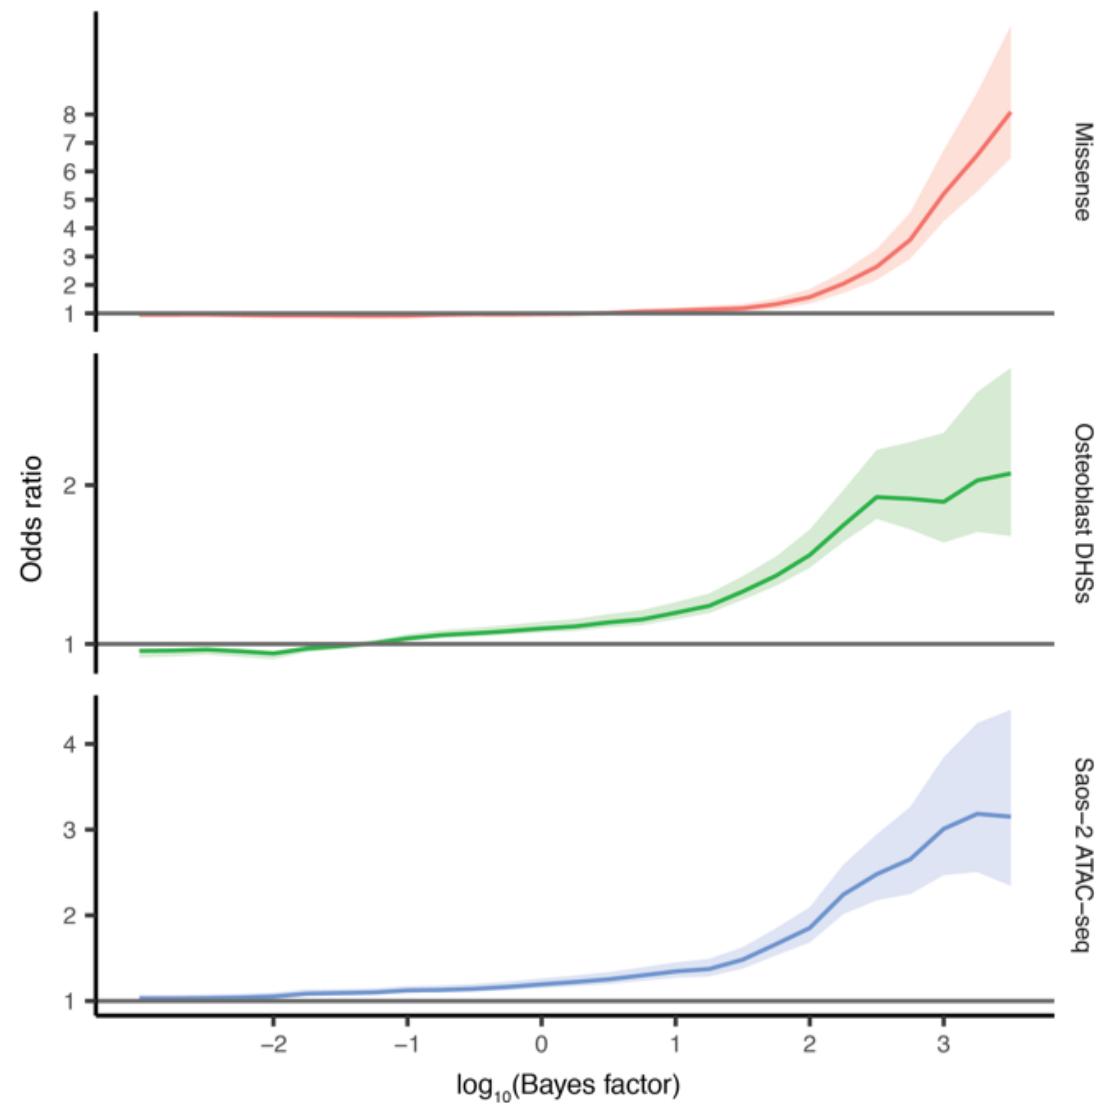

**Figure 4**

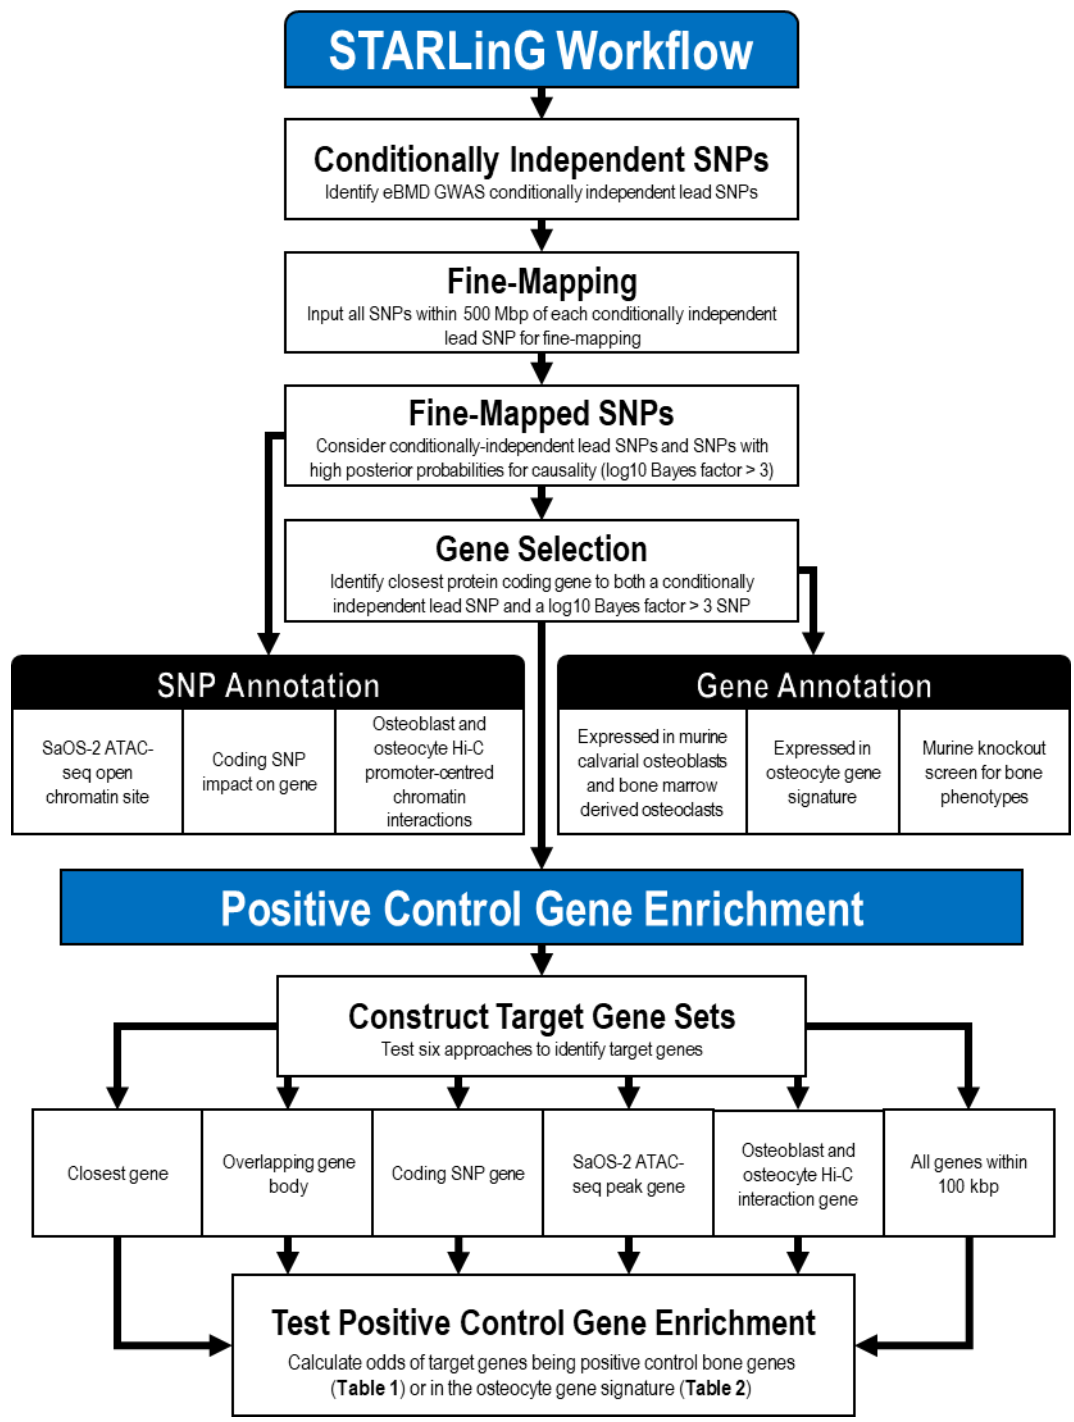



**Figure 5**

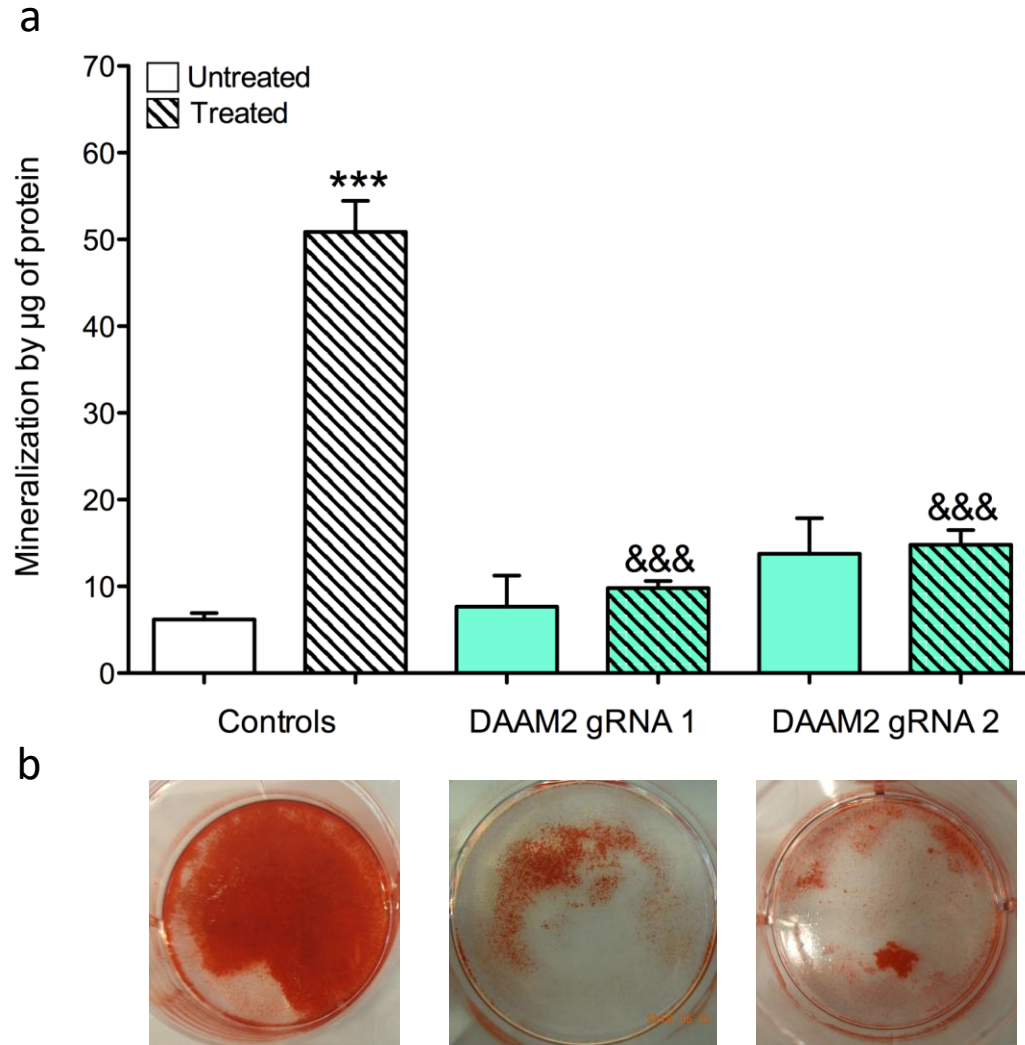

Figure 6

a

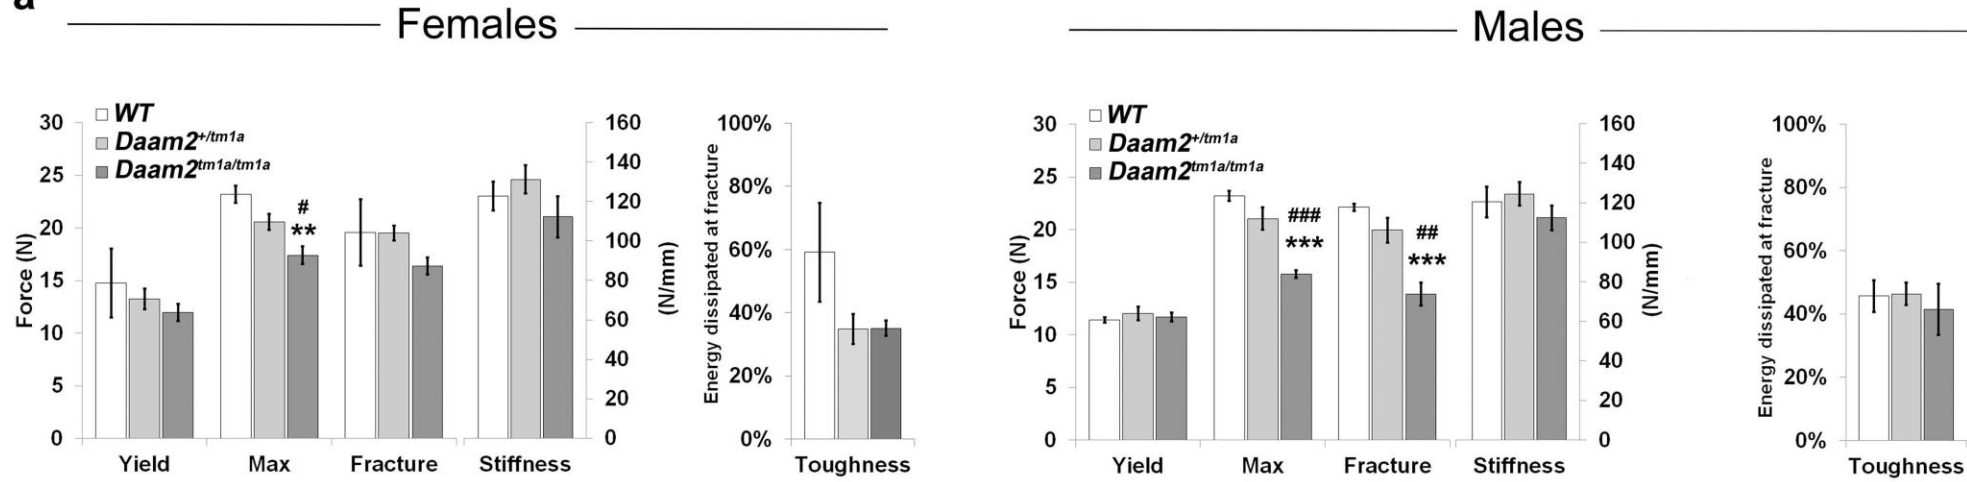

b

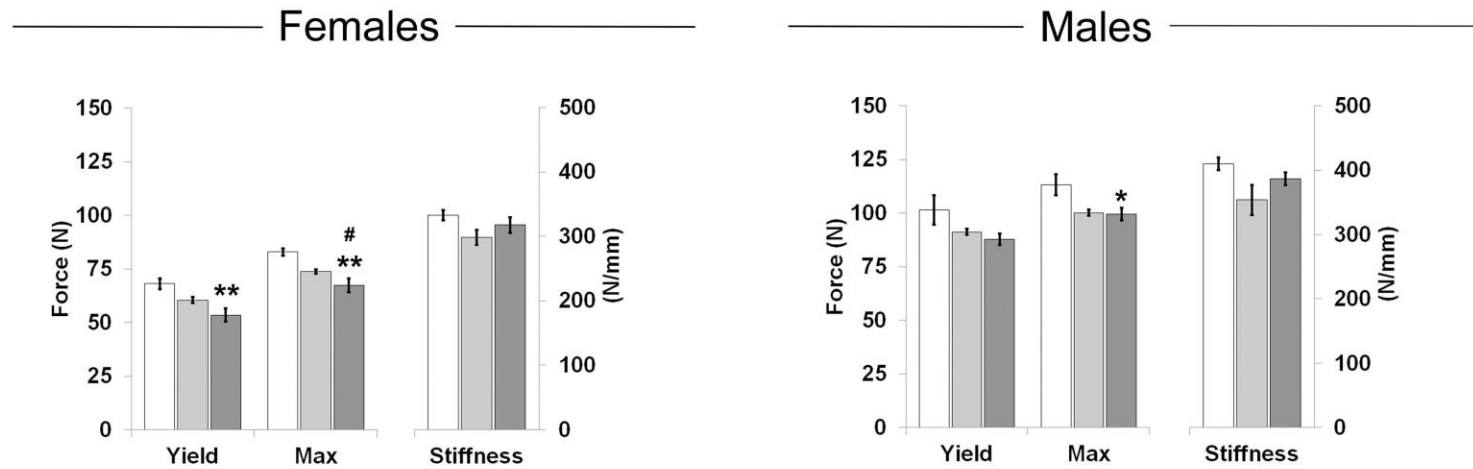

c

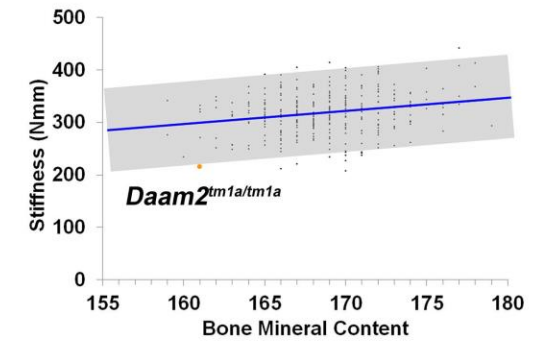

Source: https://www.biorxiv.org/content/biorxiv/early/2018/06/11/338863.full.pdf
